# Supplementary material for: Associations between maternal glycemic level and lipid profile and adverse pregnancy outcomes in women with type 2 diabetes mellitus: a retrospective study from China
Source: PeerJ journal article supplement (doi:10.7717/peerj.19502), 2025-06-04
Supplement: Data.xlsx [file Data.xlsx]

## Sheet: Sheet1
age(year)	advanced_age(1=yes;0=no)	height(cm)	prepregnancy-weight(kg)	1st_weight(kg)	OGTT_weight	3rd_weight(kg)	prepregnancy-BMI	preBMI(china_criterion:1=underweight;2=normal;3=overweight;4=obesity)	preBMI(inter_criterion:1=underweight;2=normal;3=overweight;4=obesity)	1st_BMI	3nd_BMI	gestational weight gain(GWG)	GWG_first	gestational week	preterm01(1=yes;0=no)	gravidity	parity	delivery_way(1=natural labour;2=obstetric forceps;3=Caesarean section)	delivery_time	abruption(1=yes;0=no)	implantation(1=yes;0=no)	precipitate delivery(1=yes;0=no)	shoulder dystocia(1=yes;0=no)	Distress(1=yes;0=no)	premature rupture of fetal membranes(1=yes;0=no)	intrauterine infection(1=yes;0=no)	postpartum hemorrhage(1=yes;0=no)	neonatal death(1=yes;0=no)	asphyxia(1=yes;0=no)	congenital malformation(1=yes;0=no)	sex(1=boy;2=girl)	birthweight	LGA(1=boy;2=girl)	SGA(1=boy;2=girl)	macrosomia(1=boy;2=girl)	birthweight percentage	Apgar1min	Apgar5min	Apgar10	Transfer to pediatrics(1=yes;0=no)	Transfer to PICU(1=yes;0=no)	neonatal hypoglycemia(1=yes;0=no)	preeclampsia(1=yes;0=no)	intrahepatic cholestasis(1=yes;0=no)	fatty_liver(1=yes;0=no)	Dmtype(1:T1DM;2:T2DM)	Dm during time(years)	medicine before pregnancy(1=yes;0=no)	medicine during pregnancy(1=yes;0=no)
39	1	160	58.4	61.8	68.8	70	22.8125	2	2	24.1406	27.3438	11.6	8.2	38.3	0	4	2	3	19.01.02	0	0	0	0	0	0	0	400	0	0	0	2	3780	1	0	0	95	10	10	10	0	0	0	0	0	0	2	0	0	1
36	1	158	68.5	66.8	74.1	81	27.4395	3	3	26.7585	32.4467	12.5	14.2	37	0	4	2	1	19.01.06	0	0	0	0	0	1	0	604.5	0	0	0	2	3765	1	0	0	98.9	10	10	10	0	0	0	0	0	0	2	1	1	1
32	0	162	49.9	52.1	55.9	61	19.0139	2	2	19.8522	23.2434	11.1	8.9	39.2	0	1	1	1	19.01.11	0	0	0	0	0	1	0	300	0	0	0	2	3455	0	0	0	70.4	10	10	10	0	0	0	0	0	0	2	0	0	0
39	1	160	74	71	75.9	79	28.9062	4	3	27.7344	30.8594	5	8	38.3	0	1	1	3	19.01.17	0	0	0	0	1	0	0	300	0	0	0	1	2750	0	0	0	20.4	10	10	10	0	0	0	0	0	0	2	0	0	0
36	1	168	96	97.7	102.9	105	34.0136	4	4	34.6159	37.2024	9	7.3	39.2	0	1	1	3	19.01.22	0	0	0	0	1	0	0	505	0	0	0	2	3950	1	0	0	95.7	10	10	10	0	0	0	0	0	1	2	0	0	1
36	1	159	63	65.6	71.2	76	24.9199	3	2	25.9483	30.0621	13	10.4	37.6	0	1	1	3	19.01.24	0	0	0	0	0	0	1	500	0	0	0	2	3830	1	0	0	97.8	9	10	10	1	0	0	0	0	0	2	1	1	1
36	1	158	62	64.7	70.1	72	24.8358	3	2	25.9173	28.8415	10	7.3	38.5	0	2	1	3	19.01.25	0	0	0	0	1	1	0	520	0	0	0	2	3180	0	0	0	54.1	10	10	10	0	0	0	0	0	0	2	0	0	1
38	1	156	49.3	47.7	51.2	60	20.2581	2	2	19.6006	24.6548	10.7	12.3	37	0	3	2	3	19.02.03	0	0	0	0	0	0	0	300	0	0	0	2	3350	0	0	0	70.7	10	10	10	0	0	0	1	0	3	2	8	1	1
37	1	172	73.1	74.7	79.9	81	24.7093	3	2	25.2501	27.3797	7.9	6.3	31.6	1	1	1	3	19.02.03	0	0	0	0	0	0	0		0	0	0	1	1860	1	0	0	91	10	10	10	1	1	0	1	0	0	2	15	0	1
41	1	168	66.4	66.4	75.3	76	23.5261	2	2	23.5261	26.9274	9.6	9.6	38.5	0	5	2	3	19.02.05	0	0	0	0	0	0	0	300	0	0	0	1	3500	0	0	0	80.8	10	10	10	0	0	0	0	0	0	2	0	0	0
36	1	163	83.4	84	86.5	91	31.39	4	4	31.6158	34.2504	7.6	7	40	0	5	2	1	19.02.06	0	0	0	0	0	0	0	0	0	0	0	1	3405	0	0	0	56.5	10	10	10	0	0	0	0	0	0	2	0	0	1
36	1	156	50	55.7	63.8	62	20.5457	2	2	22.8879	25.4767	12	6.3	38.5	0	3	2	3	19.02.07	0	0	0	0	0	0	0	300	0	0	1	1	3580	0	0	0	85.5	10	10	10	0	0	0	0	0	0	2	0	0	0
32	0	166	51	55.1	66.6	68.5	18.5078	2	2	19.9956	24.8585	17.5	13.4	32.6	1	2	1	1	19.02.08	0	0	0	0	0	1	1	544	0	0	0	2	2540	1	0	0	97.9	8	10	10	1	1	0	0	0	0	2	16	0	1
32	0	167	70	70.3	76.7	75	25.0995	3	3	25.2071	26.8923	5	4.7	40.3	0	2	2	1	19.02.09	0	0	0	0	0	0	0	200	0	0	0	2	3580	0	0	0	68.2	10	10	10	0	0	0	0	0	0	2	0	0	0
37	1	160	50	51.1	61	60	19.5312	2	2	19.9609	23.4375	10	8.9	38.5	0	1	1	3	19.02.10	0	0	0	0	0	1	0	600	0	0	1	1	3570	0	0	0	85	10	10	10	0	0	0	0	0	0	2	0	0	0
31	0	163	57	59	61	65	21.4536	2	2	22.2063	24.4646	8	6	37.6	0	3	2	3	19.02.11	0	0	0	0	0	0	0	400	0	0	0	1	3400	0	0	0	84.6	10	10	10	0	0	0	0	0	0	2	1	0	1
40	1	155	51	51.6	57.5	59	21.2279	2	2	21.4776	24.5578	8	7.4	38.2	0	2	2	3	19.02.12	0	0	0	0	0	0	0	300	0	0	0	1	3240	0	0	0	66.9	10	10	10	0	0	0	0	0	0	2	1	1	1
33	0	158	53	55.5	61.3	68	21.2306	2	2	22.232	27.2392	15	12.5	39.1	0	2	1	1	19.02.23	0	0	0	0	0	1	0	600	0	0	0	2	3415	0	0	0	69	10	10	10	0	0	0	0	0	0	2	0	0	0
34	0	162	56	57.6	59.9	67	21.3382	2	2	21.9479	25.5296	11	9.4	39.2	0	1	1	1	19.02.25	0	0	0	0	0	0	0	300	0	0	0	2	3280	0	0	0	54.5	10	10	10	0	0	0	0	0	0	2	0	0	1
30	0	153	67.3	67.4	76	74.5	28.7496	4	3	28.7923	31.8254	7.2	7.1	38.5	0	3	1	3	19.02.27	0	0	0	0	0	0	0	300	0	0	0	1	3870	1	0	0	95.9	10	10	10	0	0	0	0	0	0	2	0	0	0
25	0	150	53.2	53.2	59.3	66	23.6444	2	2	23.6444	29.3333	12.8	12.8	38.4	0	3	1	1	19.03.06	0	0	0	0	1	0	0	250	0	0	0	2	2705	0	0	0	15.9	9	10	10	0	0	0	0	0	0	2	2	0	0
31	1	153	62.5	64	71.4	72	26.6991	2	2	27.3399	30.7574	9.5	8	39	0	2	1	3	19.03.11	0	0	0	0	0	0	0	557	0	0	0	2	3990	0	0	0	69.9	10	10	10	0	0	1	0	0	0	2	0	1	1
37	0	168	60.4	61	68.5	71	21.4002	3	3	21.6128	25.1559	10.6	10	36	1	2	1	2	19.03.11	0	0	0	0	1	1	1	937	0	0	0	2	2790	1	0	0	97.2	10	10	10	0	0	0	0	0	0	2	1	0	1
43	1	162	54	62.9	72.5	71	20.5761	2	2	23.9674	27.0538	17	8.1	38.4	0	1	1	3	19.03.12	0	0	0	0	0	0	0	925	0	0	0	2	3580	0	0	0	86.9	10	10	10	0	0	0	0	0	0	2	0	0	1
36	1	168	72.2	74.7	76.9	75	25.5811	3	3	26.4668	26.5731	2.8	0.3	38.4	0	4	1	3	19.03.14	0	0	0	0	0	0	0	300	0	0	0	1	3050	0	0	0	44	10	10	10	0	0	0	0	0	0	2	0	0	0
31	0	152	49.4	50.2	52.4	55	21.3816	2	2	21.7278	23.8054	5.6	4.8	40.2	0	1	1	1	19.03.15	0	0	0	0	0	0	0	300	0	0	0	1	2695	0	1	0	4.6	10	10	10	0	0	0	0	0	0	2	5	1	1
29	0	160	59.8	61.5	67.1	71	23.3594	2	2	24.0234	27.7344	11.2	9.5	37.3	0	2	1	3	19.03.18	0	0	0	0	0	0	0	531	0	0	0	1	3600	1	0	0	95.5	10	10	10	0	0	0	0	0	0	2	5	1	1
44	1	158	61.5	62.4	65.6	68	24.6355	3	2	24.996	27.2392	6.5	5.6	39.6	0	3	2	3	19.03.22	0	0	0	0	0	0	0	300	0	0	0	1	3380	0	0	0	56	10	10	10	0	0	0	0	0	3	2	0	0	1
31	0	174	95	100.4	102.7	103.5	31.378	4	4	33.1616	34.1855	8.5	3.1	37.3	0	2	1	3	19.03.24	0	0	0	0	0	0	0	869	0	0	0	2	2980	0	0	0	58.5	8	10	10	0	0	0	1	0	0	2	3	0	1
38	1	171	81.4		92.8	97	27.8376	3	3	0	33.1726	15.6		37.2	0	2	1	3	19.03.29	0	0	0	0	1	1	0	400	0	0	0	1	3480	1	0	0	94.2	10	10	10	0	0	0	0	0		2	7	1	1
35	1	170	83	84.7	88.6	95	28.7197	4	3	29.308	32.872	12	10.3	37.2	0	1	1	1	19.04.03	0	0	0	0	0	0	1	400	0	0	0	2	3840	1	0	0	99.2	10	10	10	0	0	0	1	0	0	2	6	1	1
38	1	160	65.8	67.2	73	78	25.7031	3	3	26.25	30.4688	12.2	10.8	38.3	0	1	1	3	19.04.09	0	0	0	0	1	0	0	300	0	0	0	2	3050	0	0	0	46.5	10	10	10	0	0	0	0	0	0	2	4	1	1
29	0	155	58.3	60.6	69.3	75	24.2664	3	2	25.2237	31.2175	16.7	14.4	39.3	0	1	1	3	19.04.16	0	0	0	0	0	0	0	560	0	0	0	2	3040	0	0	0	30	10	10	10	0	0	0	0	0	0	2	2	0	1
33	0	164	64.7	69.5	73.8	77.5	24.0556	3	2	25.8403	28.8147	12.8	8	39.2	0	2	1	1	19.04.21	0	0	0	0	1	0	0	200	0	0	0	2	2750	0	0	0	11.9	9	9	10	0	0	0	0	0	0	2	2	1	1
40	1	154	57	60.1	63.1	66	24.0344	3	2	25.3415	27.8293	9	5.9	39.1	0	2	2	3	19.04.22	0	0	0	0	0	0	0	400	0	0	0	2	3000	0	0	0	30.5	10	10	10	0	0	0	0	0	0	2	8	0	1
31	0	154	70	71.6	77.3	80	29.5159	4	3	30.1906	33.7325	10	8.4	39	0	1	1	1	19.04.23	0	0	0	0	0	0	0	350	0	0	0	1	3855	1	0	0	94.5	10	10	10	0	0	0	0	0	0	2	1	1	1
37	1	164	69	68	68.5	74.6	25.6544	3	3	25.2826	27.7365	5.6	6.6	37.3	0	2	1	3	19.04.24	0	0	0	0	0	0	0	400	0	0	0	1	3080	0	0	0	67.8	10	10	10	0	0	0	0	0	0	2	0	0	1
32	0	160	68	71.6	72.6	72.6	26.5625	3	3	27.9688	28.3594	4.6	1	38.3	0	1	1	3	19.04.25	0	0	0	0	0	0	1	560	0	0	0	2	3180	0	0	0	59	10	10	10	1	0	0	0	0	1	2	4	1	1
36	1	160	54	58.1	69.7	74	21.0938	2	2	22.6953	28.9062	20	15.9	39.1	0	2	2	1	19.04.26	0	0	0	0	1	0	0	300	0	0	0	1	3855	1	0	0	93.9	10	10	10	1	0	0	0	0	0	2	2	1	1
34	0	164	80.5	83.7		97.5	29.9301	4	3	31.1199	36.2507	17	13.8	38.5	0	3	2	1	19.05.01	0	0	0	0	0	0	0	0	0	0	0	2	3690	1	0	0	90.6	10	10	10	0	0	0	0	0	0	2	5	1	1
35	0	155	63.5		80.4	73.5	26.4308	3	3	0	30.5931	10		31.4	1	4	1	3	19.05.03	0	0	0	0	1	1	1	300	0	1	0	1	1590	0	0	0	35.2	7	10	10	1	1	0	0	0	0	2	5	1	1
34	0	160	55	55		64.2	21.4844	2	2	21.4844	25.0781	9.2	9.2	35.6	1	1	1	3	19.05.06	0	0	0	0	0	0	0	300	0	0	1	2	2670	0	0	0	61.4	10	10	10	0	0	0	1	0	0	2	0	0	1
39	1	160	62.9	65.6	72	74.8	24.5703	3	2	25.625	29.2188	11.9	9.2	39.2	0	2	2	3	19.05.07	0	0	0	0	0	0	0	400	0	0	0	1	3250	0	0	0	36	10	10	10	0	0	0	0	0	0	2	0	0	1
37	1	156	53.8	55.8	62.6	68.8	22.1072	2	2	22.929	28.2709	15	13	37	0	2	1	3	19.05.08	0	0	0	0	0	0	0	648	0	0	0	1	3170	0	0	0	81.8	10	10	10	0	0	0	0	0	0	2	2	0	1
31	0	170	100	99.2	103	112	34.6021	4	4	34.3253	38.7543	12	12.8	37.6	0	2	1	3	19.05.09	0	0	0	0	0	0	0	300	0	0	0	1	3570	1	0	0	92.2	10	10	10	0	0	1	1	0	0	2	3	1	1
34	0	167	66.9	66.3	70.4	74	23.988	3	2	23.7728	26.5338	7.1	7.7	37.3	0	2	1	1	19.05.11	0	0	0	0	1	0	0	400	0	0	0	2	2835	0	0	0	44.2	9	10	10	1	0	0	0	0	0	2	0	0	1
35	1	162	59.2	61.8	67.5	70	22.5575	2	2	23.5482	26.6728	10.8	8.2	38.6	0	6	2	3	19.05.13	0	0	0	0	0	0	0	300	0	0	0	2	3580	0	0	0	84.2	10	10	10	0	0	0	0	0	0	2	5	1	1
34	0	163	83		94.1	96.6	31.2394	4	3	0	36.3582	13.6		38	0	4	2	3	19.05.14	0	0	0	0	0	0	0	300	0	0	0	2	3550	1	0	0	90.4	9	10	10	0	0	0	0	0	0	2	4	0	1
29	0	165	77	79.7	83.1	84.5	28.2828	4	4	29.2746	31.0376	7.5	4.8	39.3	0	1	1	3	19.05.14	0	0	0	0	0	0	0	300	0	0	0	2	3650	0	0	0	76.2	10	10	10	1	0	0	0	0	0	2	2	1	1
31	0	163	83.4	85.6	85.8	91	31.39	4	4	32.218	34.2504	7.6	5.4	39.3	0	3	2	1	19.05.14	0	0	0	0	0	0	0	300	0	0	0	1	3550	0	0	0	83	10	10	10	0	0	0	0	0	0	2	1	1	1
33	0	158	78.5			84.5	31.4453	4	4	0	33.8487	6		32.6	1	1	1	3	19.05.18	0	0	0	0	0	0	0	400	0	0	0	1	1210	0	1	0	0.1	10	10	10	1	1	0	1	0	0	2	0	0	1
34	0	174	83.5	88.5	94	98	27.5796	3	3	29.2311	32.3689	14.5	9.5	39	0	2	1	3	19.05.22	0	0	0	0	1	0	0	300	0	0	0	2	4310	1	0	1	99.6	10	10	10	0	0	0	0	0	0	2	2	1	1
37	1	165	98	106.2	109.1	110	35.9963	4	4	39.0083	40.404	12	3.8	38.1	0	1	1	3	19.05.23	0	0	0	0	1	0	0	400	0	0	0	1	3440	0	0	0	83.6	10	10	10	0	0	0	0	0	0	2	4	1	1
37	1	150	49.7	50.2	56.5	58.3	22.0889	2	2	22.3111	25.9111	8.6	8.1	39	0	2	1	3	19.05.29	0	0	0	0	0	0	0	300	0	0	0	1	3390	0	0	0	68.8	10	10	10	0	0	0	0	0	0	2	8	1	1
34	0	160	61	70.4	72.6	72	23.8281	2	2	27.5	28.125	11	1.6	36.1	1	1	1	3	19.05.30	0	0	0	0	1	0	0	200	0	0	0	1	2200	0	0	0	11.7	10	10	10	1	0	0	0	0	0	2	3	0	1
29	0	164	61.5	62.9	73	76.7	22.8659	2	2	23.3864	28.5173	15.2	13.8	38.2	0	1	1	1	19.06.01	0	0	0	0	0	0	0	300	0	0	0	2	3600	1	0	0	90.2	10	10	10	0	0	0	0	0	0	2	0	0	1
33	0	157	65.7	70.2	76	75.7	26.6542	3	3	28.4799	30.7112	10	5.5	38	0	1	1	1	19.06.04	0	0	0	0	1	0	0	603	0	0	0	1	2975	0	0	0	47	10	10	10	0	0	0	0	0	3	2	0	0	1
30	0	166	93	92.1	96.5	100.7	33.7495	4	4	33.4228	36.5438	7.7	8.6	38.1	0	1	1	3	19.06.12	0	0	0	0	0	0	0	859	0	0	0	1	3360	0	0	0	78.5	10	10	10	0	0	0	0	0	0	2	2	1	1
30	0	165	74.7	76.2	79.8	84.7	27.438	3	3	27.989	31.1111	10	8.5	37.5	0	1	1	3	19.06.13	0	0	0	0	0	1	0	300	0	0	0	1	2840	0	0	0	39.2	10	10	10	0	0	0	1	0	0	2	0	0	0
32	0	169	81	85.3	91.6	91	28.3604	4	3	29.8659	31.8616	10	5.7	36.6	1	1	1	3	19.06.18	0	0	0	0	0	0	0	300	0	0	0	2	2780	0	0	0	50.4	10	10	10	0	0	0	1	0	0	2	0	0	1
33	0	171	87.9	90	93.6	99	30.0605	4	4	30.7787	33.8566	11.1	9	38.2	0	2	1	3	19.06.24	0	0	0	0	1	1	0	607	0	0	0	2	3330	0	0	0	74.3	10	10	10	0	0	0	0	0	0	2	3	1	1
36	1	160	77.9	92.3	92.8	98	30.4297	4	4	36.0547	38.2812	20.1	5.7	37.2	0	4	2	3	19.06.25	0	0	0	0	0	0	0	1351.4	0	0	0	1	4270	1	0	1	100	10	10	10	0	0	0	0	0	0	2	1	0	1
39	0	158	66.4	66	72.2	77.6	26.5983	2	2	26.4381	31.0848	11.2	11.6	38.3	0	1	1	3	19.06.27	0	0	0	0	0	0	0	300	0	0	0	1	3210	0	0	0	88.3	10	10	10	0	0	0	0	0	0	2	2	1	1
43	1	158	60		73.5	75	24.0346	3	2	0	30.0433	15		39	0	4	2	1	19.06.27	0	0	0	0	0	0	0	300	0	0	0	2	3485	0	0	0	61.8	10	10	10	0	0	0	0	0	0	2	0	0	1
31	1	177	71.9	72.2	78.7	83.5	22.95	3	3	23.0457	26.6526	11.6	11.3	38.1	0	1	1	1	19.06.27	0	0	1	0	1	0	0		0	0	0	1	3530	0	0	0	76.4	10	10	10	0	0	0	0	0	0	2	1	1	0
35	1	166	83.9	84.4	90.7	103.2	30.4471	4	4	30.6285	37.451	19.3	18.8	39.1	0	1	1	3	19.06.28	0	0	0	0	0	0	1	627	0	0	0	2	3210	0	0	0	50	10	10	10	0	0	0	0	0	0	2	1	1	1
37	1	160	57.4	57.9	60.2	62	22.4219	3	3	22.6172	24.2188	4.6	4.1	36.4	1	4	2	3	19.07.01	0	0	0	0	0	0	0	600	0	0	0	1	2880	1	0	1	99.1	10	10	10	0	0	0	0	0	0	2	12	0	1
30	0	171	93.4	92.9	95	103	31.9415	4	4	31.7705	35.2245	9.6	10.1	39.1	0	3	1	1	19.07.01	0	0	0	0	0	0	0	1627	0	0	0	1	3635	0	0	0	84.7	10	10	10	0	0	0	0	0	0	2	0	0	1
38	1	168	65.3	67.2	72.4	74	23.1363	2	2	23.8095	26.2188	8.7	6.8	37	0	3	2	1	19.07.08	0	0	0	0	0	0	0	200	0	0	0	2	3065	0	0	0	74.2	10	10	10	0	0	0	0	0	0	2	0	0	1
37	1	161	89.5	86	86.9	84.2	34.528	4	4	33.1777	32.4833	-5.3	-1.8	38.2	0	4	2	3	19.07.09	0	0	0	0	0	0	0	400	0	0	0	1	3470	0	0	0	83.8	10	10	10	1	0	0	0	0	0	2	2	1	1
33	1	160	68	66	66	67.2	26.5625	3	2	25.7812	26.25	-0.8	1.2	38.2	0	3	1	3	19.07.11	0	0	0	0	0	0	0	400	0	0	0	2	3190	0	0	0	62.4	10	10	10	0	0	0	0	0	0	2	3	0	1
36	0	163	65.4	67.3	73.3	74.3	24.6152	3	3	25.3303	27.9649	8.9	7	39	0	2	1	3	19.07.11	0	0	0	0	0	0	0	800	0	0	0	2	3570	0	0	0	82.2	10	10	10	0	0	0	0	0	0	2	0	1	1
30	0	159	63.5	66.5	69.5	69.5	25.1177	3	3	26.3043	27.491	6	3	39.2	0	1	1	2	19.07.11	0	0	0	0	0	0	0	857	0	0	0	1	2835	0	0	0	16.6	10	10	10	1	0	0	0	0	0	2	2	1	1
29	0	166	66.7	65	71.7	76.5	24.2053	3	2	23.5883	27.7616	9.8	11.5	38	0	2	1	2	19.07.20	0	0	0	0	1	0	0	400	0	0	0	1	3105	0	0	0	59.6	10	10	10	1	0	0	0	0	0	2	1	0	1
45	1	175	65.5			75.5	21.3878	2	2	0	24.6531	10		39.1	0	3	1	3	19.07.24	0	0	0	0	1	1	0	400	0	0	0	2	2800	0	0	0	15.9	10	10	1	0	0	0	0	0	0	2	0	0	1
40	1	166	76	80.5	85.6	90	27.5802	3	3	29.2132	32.6608	14	9.5	36	1	7	2	3	19.07.25	0	0	0	0	0	0	0	530	0	0	0	1	2810	0	0	0	71.7	10	10	10	1	0	0	1	0	0	2	0	0	1
34	0	158	95.5		98	100	38.2551	4	4	0	40.0577	4.5		37.5	0	3	1	1	19.07.30	0	0	0	0	0	0	0	200	0	0	0	2	2430	0	1	0	9.3	10	10	10	0	0	0	1	0	0	2	0	1	1
34	0	159	57	58.6	61.1	62	22.5466	2	2	23.1795	24.5243	5	3.4	33.4	1	3	2	1	19.08.13	0	0	0	0	0	1	0	300	0	0	0	2	2060	0	0	0	48.4	10	10	10	1	1	0	0	0	0	2	4	0	1
31	0	168	84	86.6	90.4	97.1	29.7619	4	3	30.6831	34.4033	13.1	10.5	38.1	0	2	2	1	19.08.16	0	0	0	0	0	0	0	250	0	0	0	2	4310	1	0	1	99.9	10	10	10	0	0	0	0	0	0	2	4	1	1
39	1	164	82	77.7	82.4	87.2	30.4878	4	3	28.8891	32.4212	5.2	9.5	39.1	0	2	1	3	19.08.19	0	0	0	0	0	0	0	400	0	0	0	1	3120	0	0	0	55.2	10	10	10	0	0	0	0	0	0	2	3	1	1
36	1	162	76	77.4	83.4	87.9	28.959	4	4	29.4925	33.4934	11.9	10.5	38.3	0	2	2	3	19.08.19	0	0	0	0	0	0	0	400	0	0	0	2	3140	0	0	0	41.4	10	10	10	0	0	0	0	0	0	2	8	1	1
37	1	157	87.8	85.9	87.1	84.5	35.6201	4	4	34.8493	34.2813	-3.3	-1.4	37.3	0	3	2	3	19.08.21	0	0	0	0	0	0	0	300	0	0	0	1	2960	0	0	0	56.6	9	10	10	0	0	0	0	0	1	2	0	0	0
40	1	166	66.4	66.2	70.6	79	24.0964	3	2	24.0238	28.6689	12.6	12.8	38.3	0	3	1	3	19.08.23	0	0	0	0	0	0	0	683	0	0	0	1	3780	1	0	0	95	10	10	10	0	0	0	0	0	0	2	1	0	1
35	1	172	62.8	63.9	68.5	75	21.2277	2	2	21.5995	25.3515	12.2	11.1	38.6	0	2	1	1	19.08.28	0	0	0	0	1	0	0	350	0	0	0	1	3960	1	0	0	97.1	9	10	10	0	0	0	0	0	0	2	2	1	1
36	1	160	80.3	82	90.6	95	31.3672	4	4	32.0312	37.1094	14.7	13	39.1	0	2	1	3	19.08.29	0	0	0	0	0	0	0	642	0	0	0	1	4050	1	0	1	97.8	10	10	10	0	0	0	1	0	0	2	1	1	1
41	1	158	61	61.1	66.3	70	24.4352	3	2	24.4752	28.0404	9	8.9	37.6	0	3	1	3	19.09.02	0	0	0	0	0	1	0	967	0	0	0	1	2710	0	0	0	25.2	10	10	10	1	0	0	0	0	0	2	2	1	1
32	0	160	48.7	48.7	52.3	56	19.0234	2	2	19.0234	21.875	7.3	7.3	38.3	0	1	1	1	19.09.05	0	0	0	0	1	0	0	350	0	0	0	2	3705	1	0	0	93	10	10	10	1	0	0	0	0	0	2	0	0	1
29	0	170	71.7	70.2	72.3	79.5	24.8097	3	2	24.2907	27.5087	7.8	9.3	39.1	0	1	1	1	19.09.05	0	0	0	0	0	0	0	400	0	0	1	2	2885	0	0	0	21.4	8	9	9	0	0	0	0	0	0	2	1	1	1
34	1	163	81	82.8	89.3	93.9	30.4867	3	3	31.1641	35.3419	12.9	11.1	37.6	0	4	2	3	19.09.06	0	0	0	0	0	0	0	300	0	0	0	1	3780	1	0	0	97.2	10	10	10	0	0	0	0	0	0	2	5	1	1
38	0	161	66	65.4	71.5	70	25.462	4	4	25.2305	27.0051	4	4.6	38.1	0	1	1	3	19.09.06	0	0	0	0	0	0	0	400	0	0	0	2	3160	0	0	0	62.1	10	10	10	0	0	0	0	0	0	2	5	1	1
38	1	163	99.5	95.2	97.5	103.5	37.4497	4	4	35.8312	38.9552	4	8.3	38.4	0	1	1	2	19.09.06	0	0	0	0	1	0	0	835	0	0	0	2	2530	0	1	0	7.5	10	10	10	0	0	0	0	0	0	2	0	0	1
35	1	163	72	73.6	80.7	87	27.0993	3	3	27.7015	32.7449	15	13.4	38.3	0	2	1	2	19.09.20	0	0	0	0	0	0	0	1240	0	0	0	2	3315	0	0	0	70.9	10	10	10	0	0	0	1	0	0	2	3	0	1
30	0	170	68	66	70.6	72	23.5294	2	2	22.8374	24.9135	4	6	36.5	1	1	1	1	19.09.21	0	0	0	0	0	0	0	350	0	0	0	1	2835	0	0	0	59	10	10	10	0	0	0	0	0	0	2	0	0	1
31	0	165	67.4	73.6	76.3	78	24.7567	3	2	27.034	28.6501	10.6	4.4	40	0	2	2	1	19.09.22	0	0	0	0	0	0	0	300	0	0	0	2	3580	0	0	0	72.5	10	10	10	0	0	0	0	0	0	2	0	0	0
34	0	152	67.3	65.4	71.5	82	29.1292	4	3	28.3068	35.4917	14.7	16.6	39.2	0	1	1	3	19.09.28	0	0	0	0	0	0	0	569	0	0	0	1	3120	0	0	0	39.2	10	10	10	0	0	0	1	0	0	2	1	1	1
36	1	162	81.9	76.3	75.8	76.2	31.2071	4	4	29.0733	29.0352	-5.7	-0.1	34.1	1	1	1	1	19.10.12	0	0	0	0	1	1	0	300	0	0	0	2	2365	0	0	0	70.5	10	10	10	1	0	0	0	0	0	2	1	0	0
36	1	160	64	64	68.4	70	25	3	3	25	27.3438	6	6	35.2	1	1	1	3	19.10.22	1	0	0	0	0	0	0	1200	0	1	0	1	2280	0	0	0	32	6	9	9	1	1	0	1	0	0	2	0	0	1
37	1	163	66.2		72.7	73.4	24.9163	3	2	0	27.6262	7.2		36.5	1	3	2	3	19.10.25	0	0	0	0	0	0	0	535	0	0	0	1	3290	1	0	0	91.2	10	10	10	0	0	0	0	0	0	2	0	0	1
32	0	163	45.9	44.5	49.6	56.5	17.2758	1	1	16.7488	21.2654	10.6	12	39.1	0	2	1	3	19.10.27	1	0	0	0	1	0	0	0	0	0	0	2	2430	0	1	0	2.8	8	10	10	1	0	0	0	0	0	2	0	0	1
30	1	160	82	84.9	86	84	32.0312	3	3	33.1641	32.8125	2	-0.9	39.1	0	3	2	1	19.10.29	0	0	0	0	0	0	0	200	0	0	0	2	3195	0	0	0	48.6	10	10	10	1	0	1	0	0	0	2	0	0	1
38	0	156	67.5	69.3	77.6	80.4	27.7367	4	4	28.4763	33.0375	12.9	11.1	39.2	0	1	1	3	19.10.29	0	0	0	0	1	0	0	520	0	0	0	2	3430	0	0	0	68.3	10	10	10	0	0	0	0	0	0	2	0	0	1
27	0	167	75.5	80.2	85.6	92	27.0716	3	3	28.7569	32.9879	16.5	11.8	37.6	0	2	1	3	19.11.07	0	0	0	0	0	0	0	635	0	0	0	2	3140	0	0	0	65.4	10	10	10	0	0	0	0	0	0	2	2	1	1
39	1	159	69.5		78.5	80.5	27.491	3	3	0	31.8421	11		39.3	0	2	1	3	19.11.12	0	0	0	0	0	0	0	891	0	0	0	2	3850	1	0	0	92.4	10	10	10	0	0	0	0	0	0	2	0	0	0
31	0	155	61.5		64.2	70.4	25.5983	3	3	0	29.3028	8.9		33.4	1	4	3	3	19.11.14	0	0	0	0	0	0	0	500	0	0	0	2	2020	0	0	0	42.9	10	10	10	1	1	0	1	0	0	2	0	0	1
36	1	165	68	73.1	79.7	80	24.977	3	3	26.8503	29.3848	12	6.9	33	1	2	2	3	19.11.21	0	0	0	0	0	1	0	400	0	1	0	1	2340	1	0	0	90.5	6	10	10	1	1	0	0	0	0	2	0	0	1
36	1	163	70			80	26.3465	3	3	0	30.1103	10		27	1	4	3	3	19.11.25	0	0	0	0	1	0	0	0	0	1	0	1	850	0	0	0	10.3	4	8	9	1	1	0	1	0	1	2	6	0	1
42	1	168	76.6	76.6	82.1	83.4	27.14	3	2	27.14	29.5493	6.8	6.8	38.5	0	2	2	3	19.11.26	0	0	0	0	0	0	0	300	0	0	0	1	3390	0	0	0	72.8	10	10	10	0	0	0	0	0	0	2	0	0	1
36	1	165	67.6		71.2	75	24.8301	3	3	0	27.5482	7.4		39.3	0	1	1	1	19.11.26	0	0	0	0	1	0	0	0	0	0	0	1	3410	0	0	0	64.6	10	10	10	0	0	0	0	0	0	2	0	0	1
35	1	158	68.4	67.2	72.2	75	27.3995	3	3	26.9188	30.0433	6.6	7.8	37.6	0	1	1	1	19.11.27	0	0	0	0	1	0	0	0	0	0	0	1	3475	0	0	0	88.4	10	10	10	0	0	0	0	0	0	2	1	0	0
38	1	165	80.9	81.8	88.7	93.3	29.7153	4	3	30.0459	34.27	12.4	11.5	39	0	4	2	3	19.12.03	0	0	0	0	0	1	0	0	0	0	0	1	3840	1	0	0	94.1	10	10	10	0	0	0	0	0	0	2	2	0	1
38	1	168	86	85	90	93.5	30.4705	4	4	30.1162	33.1278	7.5	8.5	37	0	1	1	1	19.12.10	0	0	0	0	0	1	0	1193	0	0	0	1	3765	1	0	0	98.9	10	10	10	1	0	0	0	0	0	2	1	1	1
33	0	163	71.7	73	78	84	26.9863	3	3	27.4756	31.6158	12.3	11	39.4	0	2	1	3	19.12.16	0	0	0	0	1	0	0	0	0	0	0	2	2930	0	0	0	19.8	10	10	10	0	0	0	0	0	0	2	3	0	0
36	1	158	73.5	74.4	69.7	77.5	29.4424	4	3	29.8029	31.0447	4	3.1	38.5	0	2	1	2	19.12.18	0	0	0	0	1	0	1	1050	0	0	0	2	2755	0	0	0	17.5	8	9	10	0	0	0	0	0	0	2	0	0	0
33	0	162	67	76.1	81.7	83	25.5296	3	3	28.9971	31.6263	16	6.9	38.3	0	1	1	3	19.12.23	0	0	0	0	1	0	1	300	0	0	0	1	3530	0	0	0	85.6	10	10	10	0	0	0	0	0	1	2	0	0	1
29	0	161	52	49.4	55.6	67	20.061	2	2	19.0579	25.8478	15	17.6	37.2	0	1	1	3	20.01.13	0	0	0	0	0	0	0	0	0	0	0	2	2630	0	0	0	29.9	10	10	10	0	0	0	0	0	0	2	0	0	0
36	1	170	83.8	85.7	95.6	100	28.9965	4	3	29.654	34.6021	16.2	14.3	39.3	0	2	1	2	20.01.14	0	0	0	0	1	0	0	645	0	0	0	2	3220	0	0	0	46.6	9	9	9	1	0	0	0	0	0	2	1	1	1
32	0	165	70	77.5	79.5	82	25.7117	3	3	28.4665	30.1194	12	4.5	38.4	0	4	1	1	20.01.20	0	0	0	0	0	0	0	0	0	0	1	1	3595	0	0	0	87.6	10	10	10	0	0	0	0	0	0	2	0	0	1
36	1	160	64.2	66.4	69.8	73.5	25.0781	3	3	25.9375	28.7109	9.3	7.1	39.6	0	1	1	2	20.01.21	0	0	0	0	1	0	1	810	0	0	1	1	3480	1	0	0	99.6	10	10	10	0	0	0	0	0	0	2	0	0	1
38	1	172	92.6	99.9	105	105.5	31.3007	4	4	33.7683	35.6612	12.9	5.6	38.5	0	2	1	3	20.01.21	0	0	0	0	0	0	0	800	0	0	0	1	4280	0	0	1	65.4	10	10	10	0	0	0	0	0	0	2	0	0	1
41	1	163	111		117	114	41.778	4	4	0	42.9071	3		37	0	5	2	3	20.02.03	0	0	0	0	1	0	1	0	0	0	0	2	4110	1	0	1	99.9	10	10	10	0	0	0	0	0	0	2	5	0	1
37	1	168	99.6	99.2	101.5	107	35.2891	4	4	35.1474	37.911	7.4	7.8	38	0	3	2	3	20.02.07	0	0	0	0	1	0	0	520	0	1	0	2	3140	0	0	0	62.8	6	10	10	1	0	0	0	0	0	2	5	1	1
31	0	159	62.5	60	70.3	72.3	24.7221	3	2	23.7332	28.5986	9.8	12.3	39.2	0	1	1	3	20.02.11	0	0	0	0	0	0	0	0	0	0	0	1	4500	1	0	1	99.9	10	10	10	0	0	0	0	0	0	2	0	0	1
31	0	160	62.4	65.8	78.4	79.4	24.375	3	2	25.7031	31.0156	17	13.6	31.4	1	2	1	3	20.02.21	0	0	0	0	0	0	0	0	0	0	0	1	1890	0	0	0	81.7	10	10	10	1	1	0	1	0	0	2	15	1	1
27	0	159	71.2	71.2	75.3	78.4	28.1634	4	3	28.1634	31.0114	7.2	7.2	35	1	2	1	3	20.02.24	0	0	0	0	0	0	0	582	0	0	0	1	2220	0	0	0	31.8	10	10	10	1	0	0	1	0	0	2	2	0	1
32	0	160	63		72.5	73	24.6094	3	2	0	28.5156	10		39.2	0	1	1	3	20.03.07	0	0	0	0	1	0	0	0	0	0	0	2	3050	0	0	0	32.8	9	10	10	0	0	0	0	0	0	2	0	0	1
36	1	162	71.3	70.4	78.3	79.5	27.1681	3	3	26.8252	30.2926	8.2	9.1	39.2	0	3	2	1	20.03.11	0	0	0	0	0	0	0	570	0	0	0	2	3620	0	0	0	82.5	10	10	10	0	0	0	0	0	0	2	1	1	1
35	1	164	49.8	50	62.6	67	18.5158	2	2	18.5901	24.9108	17.2	17	39	0	1	1	1	20.03.13	0	0	0	0	0	1	0	0	0	0	0	1	2925	0	0	0	26.2	10	10	10	0	0	0	0	0	0	2	0	0	1
26	0	175	80		86.8	92	26.1224	3	2	0	30.0408	12		37.4	0	1	1	3	20.03.20	0	0	0	0	0	0	0	0	0	0	0	2	3630	0	0	0	79.1	10	10	10	0	0	0	0	0	0	2	0	0	1
31	0	166	71	71.4	78.7	86	25.7657	3	3	25.9109	31.2092	15	14.6	37	0	1	1	1	20.03.20	0	0	0	0	0	1	0	0	0	0	0	1	3130	1	0	0	95.5	10	10	10	0	0	0	0	0	0	2	1	0	1
29	0	160	63.1		68.6	70.5	24.6484	3	3	0	27.5391	7.4		38.4	0	1	1	1	20.03.20	0	0	0	0	0	0	0	0	0	0	0	1	3265	0	0	0	49	10	10	10	0	0	0	1	0	0	2	1	0	1
34	0	160	67	70.4	73.6	75.4	26.1719	3	3	27.5	29.4531	8.4	5	37.2	0	3	3	3	20.03.24	0	0	0	0	0	0	0	1107	0	0	0	2	2500	0	0	0	19.2	10	10	10	1	0	0	0	0	0	2	7	1	1
32	0	158	48.6		55.6	59.5	19.468	2	2	0	23.8343	10.9		38.5	0	5	1	1	20.03.25	0	0	0	0	0	0	0	0	0	0	0	1	2755	0	0	0	17.5	10	10	10	0	0	0	0	0	0	2	0	0	0
35	1	159	67.8	71.1	71.4	71.8	26.8186	3	3	28.1239	28.4008	4	0.7	37.6	0	3	1	3	20.03.26	0	0	0	0	1	0	0	0	0	0	0	1	2780	0	0	0	35.1	10	10	10	0	0	0	0	0	0	2	0	0	1
31	1	173	64	61	69.3	79	21.3839	4	4	20.3816	26.3958	15	18	39.3	0	1	1	3	20.03.26	0	0	0	0	0	0	0	0	0	0	0	1	4130	1	0	0	98.2	10	10	10	0	0	0	0	0	0	2	15	0	1
38	1	160	77.6	79.8	85	85	30.3125	4	4	31.1719	33.2031	7.4	5.2	37.6	0	1	1	3	20.03.31	0	0	0	0	0	0	0	0	0	0	0	1	3540	1	0	0	91.1	10	10	10	0	0	0	0	0	1	2	0	0	1
34	0	172	82.7	82.7	88.1	91	27.9543	4	3	27.9543	30.7599	8.3	8.3	33.3	1	1	1	3	20.04.06	0	0	0	0	0	1	1	0	0	0	0	2	2100	0	0	0	57.9	10	10	10	1	1	0	0	0	0	2	1	0	1
35	1	170	78.3	72.4	75.6	71	27.0934	3	3	25.0519	24.5675	-7.3	-1.4	38	0	2	1	1	20.04.08	0	0	0	0	0	1	0	0	0	0	0	1	3130	0	0	0	61.9	10	10	10	0	0	0	0	0	0	2	0	0	1
35	1	156	64.7	66.5	71.1	73.4	26.5861	3	3	27.3258	30.1611	8.7	6.9	39.1	0	1	1	3	20.04.14	0	0	0	0	0	0	0	0	0	0	0	2	3430	0	0	0	70.2	10	10	10	0	0	0	0	0	0	2	1	0	1
35	1	155	54.8		66	72.8	22.8096	2	2	0	30.3018	18		31	1	1	1	3	20.04.16	0	0	0	0	0	0	0	0	0	0	0	2	1530	0	0	0	42.6	10	10	10	1	1	0	1	0	0	2	0	0	0
35	1	174	72.5	73.3	78	83	23.9464	2	2	24.2106	27.4145	10.5	9.7	39.1	0	2	2	1	20.04.21	0	0	0	0	0	0	0	0	0	0	0	2	3150	0	0	0	44.2	10	10	10	0	0	0	0	0	0	2	5	1	1
41	1	163	71.6		82.3	86.6	26.9487	3	3	0	32.5944	15		35.6	1	4	1	3	20.04.26	0	0	0	0	0	0	0	0	0	0	0	2	2500	0	0	0	43.1	10	10	10	0	0	0	1	0	0	2	0	0	1
36	1	163	73.4	72.3	77.1	81	27.6262	3	3	27.2122	30.4867	7.6	8.7	39.2	0	2	1	3	20.04.27	0	0	0	0	0	0	0	560	0	0	0	2	3480	0	0	0	72.5	10	10	10	0	0	0	0	0	0	2	2	0	1
29	0	157	51.2	51.9	54	55.8	20.7716	2	2	21.0556	22.6378	4.6	3.9	39.1	0	1	1	3	20.04.28	0	0	0	0	0	0	0	300	0	0	0	1	2620	0	1	0	7.4	10	10	10	0	0	0	0	0	0	2	3	0	1
37	1	157	57	58.7	62.6	65	23.1247	2	2	23.8144	26.3702	8	6.3	39	0	2	1	3	20.04.30	0	0	0	0	1	0	0	0	0	0	0	1	3250	0	0	0	56.1	10	10	10	0	0	0	0	0	0	2	4	0	1
38	1	166.5	55.6	59.1	63.2	69.6	20.0561	2	2	21.3186	25.1062	14	10.5	37.2	0	2	2	3	20.05.08	0	0	0	0	0	0	0	0	0	0	0	2	2420	0	0	0	14	10	10	10	0	0	0	0	0	0	2	0	0	1
31	0	161	60	60	65.4	66	23.1473	2	2	23.1473	25.462	6	6	32	1	2	1	3	20.05.10	0	0	0	0	0	0	0	535	0	0	0	1	2260	1	0	0	96.9	8	8	10	1	0	0	0	0	0	2	0	0	1
27	0	154	65	67.2		77	27.4077	3	3	28.3353	32.4675	12	9.8	38.5	0	5	2	2	20.05.11	0	0	0	0	1	0	0	1222	0	1	0	1	3600	0	0	0	86.6	6	9	10	1	0	0	0	0	0	2	0	0	1
38	1	166	73.5			80.5	26.673	3	3	0	29.2132	7		36.4	1	2	1	3	20.05.17	0	0	0	0	0	1	0	0	0	1	0	1	3340	1	0	0	96.3	6	8	10	1	0	0	0	0	0	2	0	0	1
37	1	167	69.7			78.7	24.9919	3	3	0	28.219	9		38.3	0	2	2	1	20.05.19	0	0	0	0	0	0	0	0	0	0	0	1	3615	0	0	0	89.7	10	10	10	0	0	0	0	0	0	2	0	0	0
37	0	158.5	66	68	72	76	26.2715	2	2	27.0676	30.2521	10	8	38.5	0	3	2	3	20.05.26	0	0	0	0	0	0	0	635	0	0	0	1	3810	1	0	1	94.5	10	10	10	0	0	0	0	0	0	2	9	0	1
33	1	172	65.5	65.7	69.9	75.8	22.1403	3	3	22.208	25.622	10.3	10.1	39	0	1	1	3	20.05.26	0	0	0	0	0	0	0	0	0	0	0	1	4110	1	0	0	98.6	10	10	10	0	0	0	0	0	0	2	3	1	1
28	0	150	58	56.9	63.4	68	25.7778	3	3	25.2889	30.2222	10	11.1	39.2	0	2	1	3	20.05.28	0	0	0	0	1	0	1	0	0	1	1	2	3050	0	0	0	32.8	6	8	10	1	0	0	0	0	0	2	0	0	1
34	0	163	67.3	70.7	77.7	80	25.3303	3	3	26.61	30.1103	12.7	9.3	35.4	1	2	2	3	20.06.09	1	0	0	0	1	0	0	703	0	1	0	1	1880	0	1	0	3	2	7	7	1	1	0	0	0	0	2	0	0	1
32	0	166	87.2	88.4	91.5	91.5	31.6447	2	2	32.0801	33.2051	4.3	3.1	37.6	0	2	1	3	20.06.10	0	0	0	0	0	0	0	0	0	0	0	2	3790	1	0	0	97.3	10	10	10	1	0	0	0	0	0	2	0	0	0
31	0	153	53	54.2	64.4	65	22.6409	4	4	23.1535	27.7671	12	10.8	38.5	0	2	1	3	20.06.10	0	0	0	0	0	1	0	535	0	0	0	1	3155	0	0	0	51.7	10	10	10	0	0	0	0	0	0	2	0	0	1
34	0	169	50	54.6	59.5	65	17.5064	1	1	19.117	22.7583	15	10.4	39.5	0	1	1	3	20.06.15	0	0	0	0	0	0	0	0	0	0	0	2	3280	1	0	0	93.4	10	10	10	0	0	0	0	0	0	2	0	0	1
32	0	172	80	84.2	88	89	27.0416	3	3	28.4613	30.0838	9	4.8	38.5	0	3	1	1	20.06.15	0	0	0	0	0	0	0	615	0	0	0	1	3770	0	0	0	48.2	10	10	10	0	0	0	0	0	0	2	4	1	1
30	0	171	96		100	103	32.8306	4	4	0	35.2245	7		38.1	0	1	1	1	20.07.13	0	0	0	0	0	1	0	0	0	0	0	2	3500	0	0	0	86.9	10	10	10	0	0	0	0	0	0	2	2	1	1
28	0	164	65.5	66.1	69.4	72	24.3531	3	2	24.5761	26.7698	6.5	5.9	39.1	0	2	1	1	20.07.15	0	0	0	0	0	0	0	0	0	1	0	2	3385	0	0	0	41.3	10	10	10	1	0	0	0	0	0	2	2	1	1
31	0	169	76	78	81.7	86	26.6097	3	3	27.31	30.111	10	8	38.2	0	1	1	3	20.07.15	0	0	0	0	1	0	1	835	0	0	0	2	2970	0	0	0	66.4	6	9	10	0	0	0	0	0	0	2	0	0	1
32	0	158	61.5	66.1	74	71.5	24.6355	3	2	26.4781	28.6412	10	5.4	29.4	1	6	3	3	20.07.16	0	0	0	0	1	0	0	0	0	0	0	1	1140	0	0	0	10.7	10	10	10	1	1	0	1	0	0	2	0	0	0
35	1	163	71.4	71.4	70.4	90	26.8734	3	3	26.8734	33.8741	18.6	18.6	38	0	3	1	1	20.07.27	0	0	0	0	0	0	0	0	0	0	0	2	2930	0	0	0	42.6	10	10	10	0	0	0	0	0	0	2	0	0	1
37	1	170	60		66.5	69	20.7612	2	2	0	23.8754	9		37.6	0	4	2	1	20.08.02	0	0	0	0	0	0	0	0	0	0	0	2	2820	0	0	0	34.7	10	10	10	0	0	0	0	0	0	2	1	1	1
36	1	171	69	71.3	70	70	23.597	2	2	24.3836	23.939	1	-1.3	37.6	0	5	2	1	20.08.03	0	0	0	0	0	1	0	0	0	0	0	1	3665	1	0	0	94.9	10	10	10	0	0	0	0	0	0	2	0	1	1
38	1	166	74.1	78.9	84.7	86.1	26.8907	3	3	28.6326	31.2455	12	7.2	35	1	13	2	3	20.08.11	0	1	0	0	0	0	1	1510	0	0	0	1	2740	0	0	0	84.6	10	10	10	1	1	0	0	0	0	2	0	0	1
37	1	160	49	52.9	61.1	66	19.1406	2	2	20.6641	25.7812	17	13.1	37.5	0	4	2	3	20.08.16	0	0	0	0	0	0	0	0	0	0	0	1	2980	0	0	0	52.9	10	10	10	0	0	0	0	0	0	2	23	0	0
25	0	167	79	82.7	87.9	94	28.3266	4	3	29.6533	33.705	15	11.3	38.4	0	3	1	1	20.08.28	0	0	0	0	0	0	0	0	0	0	0	2	3160	0	0	0	54.6	10	10	10	0	0	0	0	0	0	2	2	1	1
41	1	160	64	66.3	70.8	75.8	25	3	3	25.8984	29.6094	11.8	9.5	38.4	0	2	2	3	20.09.19	0	0	0	0	0	0	0	300	0	0	0	2	3700	1	0	0	91.9	10	10	10	0	0	0	0	0	0	2	0	0	1
33	0	156	58	56	62.1	68	23.833	2	2	23.0112	27.9421	10	12	38.5	0	1	1	1	20.09.24	0	0	0	0	0	1	0	0	0	0	0	2	3180	0	0	0	54.1	10	10	10	0	0	0	0	0	0	2	16	0	1
37	1	164	49.6		54.6	59.6	18.4414	1	1	0	22.1594	10		39	0	1	1	3	20.09.29	0	0	0	0	0	0	0	0	0	0	1	2	3740	1	0	0	90.7	10	10	10	1	0	0	0	0	0	2	10	1	1
38	1	158	56.2	57.9	62.8	67	22.5124	2	2	23.1934	26.8386	10.8	9.1	38	0	3	1	3	20.09.30	0	0	0	0	0	0	0	0	0	0	0	2	2960	0	0	0	45.5	10	10	10	0	0	0	0	0	0	2	0	0	1
33	0	168	80.8	80.7	83.7	86.4	28.6281	4	3	28.5927	30.6122	5.6	5.7	38.3	0	2	1	3	20.09.30	0	0	0	0	0	0	0	0	0	0	0	1	3560	0	0	0	87.2	10	10	10	0	0	0	0	0	0	2	0	0	1
30	0	152	49.9	51.5	56.8	64	21.598	2	2	22.2905	27.7008	14.1	12.5	39.5	0	1	1	3	20.10.05	0	0	0	0	1	1	0	0	0	0	0	2	2900	0	0	0	16.5	10	10	10	0	0	0	0	0	0	2	2	0	1
27	0	165	66	66.9	69.4	73	24.2424	3	2	24.573	26.8136	7	6.1	37.4	0	1	1	3	20.10.06	0	0	0	0	0	0	0	0	0	0	0	1	3020	0	0	0	59.6	10	10	10	0	0	0	1	0	0	2	2	1	1
31	0	157	70	66.9	73.1	79	28.3987	4	3	27.1411	32.05	9	12.1	38.4	0	2	1	3	20.10.12	0	0	0	0	0	0	0	762	0	0	0	2	3880	1	0	0	96.6	10	10	10	0	0	0	0	0	0	2	3	1	1
38	1	174	83.3	90.4	101	105.3	27.5135	3	3	29.8586	34.78	22	14.9	31.5	1	2	1	3	20.10.13	0	0	0	0	0	0	0	574	0	0	0	2	1910	0	0	0	80.5	10	10	10	1	1	0	1	0	0	2	0	0	1
35	1	168	73.5	70.4	74.1	78.5	26.0417	3	3	24.9433	27.8132	5	8.1	38.3	0	2	2	1	20.10.14	0	0	0	0	0	0	0	0	0	0	0	1	3265	0	0	0	73.7	10	10	10	0	0	0	0	0	0	2	0	0	1
32	0	157	67.5	66.6	70.9	75	27.3845	3	3	27.0194	30.4272	7.5	8.4	37.2	0	2	1	1	20.10.14	0	0	0	0	0	0	1	840	0	0	0	2	3090	0	0	0	66.7	10	10	10	0	0	0	0	0	0	2	3	0	1
31	0	167	73		74.9	78	26.1752	3	3	0	27.968	5		36.1	1	2	1	1	20.10.15	0	0	0	0	0	1	0	0	0	0	0	2	2920	0	0	0	78	10	10	10	1	0	0	0	0	0	2	0	0	1
26	0	168	64.4	63	66.4	73	22.8175	2	2	22.3214	25.8645	8.6	10	39.1	0	1	1	1	20.10.16	0	0	0	0	0	0	0	0	0	0	0	1	3430	0	0	0	70.2	10	10	10	0	0	0	0	0	0	2	0	0	1
37	1	159	70	69.4		79.5	27.6888	3	3	27.4514	31.4465	9.5	10.1	38.1	0	2	1	3	20.10.21	0	0	0	0	0	0	0	0	0	0	0	1	3370	0	0	0	79.2	10	10	10	0	0	0	0	0	0	2	3	1	1
32	0	170	66		70.2	77.5	22.8374	2	2	0	26.8166	11.5		39.3	0	1	1	3	20.11.03	0	0	0	0	0	0	0	0	0	0	0	2	3360	0	0	0	60	10	10	10	0	0	0	0	0	0	2	0	0	1
38	1	168	68.3	66.2	67.8	75	24.1993	3	2	23.4552	26.5731	6.7	8.8	39	0	4	1	1	20.11.13	0	0	0	0	0	0	0	0	0	0	0	2	2665	0	0	0	67.3	10	10	10	0	0	0	0	0	1	2	2	1	1
22	0	173	80	81.3	84.1	88.5	26.7299	3	3	27.1643	29.57	8.5	7.2	39	0	1	1	3	20.11.18	0	0	0	0	0	0	1	1093	0	0	0	1	3010	0	0	0	33.4	10	10	10	0	0	0	0	0	0	2	1	1	1
39	1	172	74.7	74.8	79.9	85	25.2501	3	3	25.2839	28.7317	10.3	10.2	34.4	1	4	1	3	20.11.20	0	0	0	0	0	0	0	0	0	1	0	1	2200	0	0	0	39.6	6	9	10	1	1	0	1	0	0	2	10	1	1
31	0	170	110.1	110.9	113	116.1	38.0969	4	4	38.3737	40.173	6	5.2	37.6	0	4	1	3	20.11.27	0	0	0	0	0	0	0	0	0	0	1	1	4150	1	0	1	99.7	10	10	10	0	0	0	0	0	0	2	0	0	1
33	0	170	71	69.8	74.9	81	24.5675	3	2	24.1522	28.0277	10	11.2	38.3	0	2	1	1	20.12.08	0	0	0	0	0	1	0	0	0	0	0	1	3130	0	0	0	75.2	10	10	10	0	0	0	0	0	0	2	0	0	1
27	0	167	78	75.7	87.1	91.6	27.968	4	3	27.1433	32.8445	13.6	15.9	37.3	0	2	1	3	20.12.08	0	0	0	0	0	0	1	0	0	0	0	1	3170	0	0	0	54.2	10	10	10	0	0	0	1	0	0	2	0	0	1
41	1	163	65.5	70	78.1	78.1	24.6528	3	2	26.3465	29.3952	12.6	8.1	29.3	1	1	1	3	20.12.15	0	0	0	0	0	1	0	0	0	1	1	2	1390	0	0	0	69.5	6	10	10	1	1	0	0	0	0	2	0	0	0
41	1	150	49.6	49.1	57.9	61.5	22.0444	2	2	21.8222	27.3333	11.9	12.4	38.4	0	5	2	3	20.12.28	0	0	0	0	0	0	0	576	0	0	0	1	3370	0	0	0	73.3	10	10	10	0	0	0	0	0	0	2	8	1	1
32	0	168	68.5	68.5	69.9	71.5	24.2701	3	2	24.2701	25.333	3	3	38	0	2	2	1	21.01.07	0	0	0	0	0	0	0	0	0	0	1	1	3040	0	0	0	53.3	10	10	10	1	0	0	0	0	0	2	0	0	1
37	1	162	71	71.4	74.6	77	27.0538	3	3	27.2062	29.34	6	5.6	38.3	0	1	1	3	21.01.30	0	0	0	0	0	0	0	0	0	0	1	2	2910	0	0	0	33.3	10	10	10	0	0	0	0	0	0	2	0	0	1
41	1	163	48.7	56.1	57.6	58.7	18.3296	1	1	21.1148	22.0934	10	2.6	38.3	0	3	1	3	21.02.07	0	0	0	0	0	0	0	0	0	0	0	2	3130	0	0	0	54.2	10	10	10	0	0	0	0	0	0	2	4	1	1
33	0	162	77.7	78.5	86.7	93	29.6068	4	3	29.9116	35.4367	15.3	14.5	39.1	0	1	1	3	21.02.20	0	0	0	0	0	0	0	0	0	0	0	1	3810	1	0	0	92.5	10	10	10	0	0	0	0	0	0	2	0	0	1
36	1	170	70.6	72.4	76.2	80.6	24.4291	3	2	25.0519	27.8893	10	8.2	39.5	0	1	1	3	21.03.02	0	0	0	0	0	0	0	0	0	0	0	1	3500	0	0	0	68.9	10	10	10	0	0	0	0	0	0	2	0	1	1
41	1	163	85			95	31.9922	4	4	0	35.756	10		38	0	4	3	3	21.09.09	0	0	0	0	0	0	0	400	0	0	0	2	3840	1	0	0	97.6	10	10	10	0	0	1	0	0	0	2	0	0	1
34	0	168.5	81.5	81.5	83	92.5	28.705	4	3	28.705	32.5793	11	11	39	0	1	1	1	21.1.14	0	0	0	0	0	0	0	0	0	0	0	2	3180	0	0	0	49.4	10	10	10	0	0	0	0	0	0	2	1	0	1
27	0	165	69.8	68.2	69.7	74	25.6382	3	3	25.0505	27.1809	4.2	5.8	39.3	0	1	1	3	21.10.05	0	0	0	0	0	0	0	200	0	0	0	2	3050	0	0	0	30.9	10	10	10	0	0	0	0	0	0	2	1	1	1
38	1	157	70	77.8	79.1	82	28.3987	4	3	31.5631	33.2671	12	4.2	37.4	0	2	1	3	21.10.07	0	0	0	0	0	0	0	300	0	0	0	1	3060	0	0	0	63.3	10	10	10	0	0	0	1	0	0	2	0	0	1
39	1	168.5	55	57.5	63	66	19.3715	2	2	20.252	23.2458	11	8.5	40	0	2	2	1	21.10.18	0	0	0	0	0	0	0	370	0	0	0	2	3595	0	0	0	73.7	10	10	10	0	0	0	0	0	0	2	0	0	0
32	0	143	53.4	54.2	57.9	64	26.1137	3	3	26.505	31.2974	10.6	9.8	38.3	0	1	1	3	21.10.22	0	0	0	0	0	0	0	400	0	0	0	2	2860	0	0	0	29	10	10	10	0	0	0	0	0	0	2	1	1	1
28	0	160	87.4	93	100	103.4	34.1406	4	4	36.3281	40.3906	16	10.4	39.2	0	1	1	1	21.10.24	0	0	0	0	0	0	0	500	0	0	0	1	3330	0	0	0	59.3	9	10	10	0	0	0	0	0	0	2	6	0	1
36	1	168	75.9	80.1	85.1	92.8	26.892	3	3	28.3801	32.8798	16.9	12.7	39	0	4	2	1	21.10.26	0	0	0	1	1	0	0	500	0	1	0	1	4080	1	0	1	98.3	7	10	10	1	0	0	0	0	0	2	6	1	1
36	1	160	67.9		74.2	74.9	26.5234	3	3	0	29.2578	7		37.1	0	2	1	3	21.11.02	0	0	0	0	0	0	0	500	0	0	0	2	2850	0	0	0	51.5	10	10	10	0	0	0	1	0	0	2	0	0	1
33	1	160	68	71.5	81	90	26.5625	2	2	27.9297	35.1562	22	18.5	37.3	0	1	1	3	21.11.08	0	0	0	0	0	0	0	350	0	0	0	2	2340	0	1	0	7.6	8	10	10	0	0	0	0	0	0	2	0	0	1
38	0	166.5	62	69.9	74	77	22.3647	3	3	25.2144	27.7755	15	7.1	39.2	0	3	1	1	21.11.08	0	0	0	0	0	0	0	700	0	0	0	1	3765	0	0	0	90	10	10	10	0	0	0	0	0	0	2	0	0	1
32	0	158	54.3	59.8	66.4	66.8	21.7513	2	2	23.9545	26.7585	12.5	7	37.6	0	1	1	3	21.11.09	0	0	0	0	0	0	0	400	0	0	0	1	3480	0	0	0	88.6	10	10	10	0	0	0	0	0	0	2	0	0	0
32	0	165	52	56.7	61.7	64	19.1001	2	2	20.8264	23.5078	12	7.3	39.6	0	1	1	1	21.11.10	0	0	0	0	0	0	0	320	0	0	0	2	3035	0	0	0	24.3	10	10	10	0	0	0	0	0	0	2	0	0	0
30	0	166	100	101.4	104	109	36.2897	4	4	36.7978	39.5558	9	7.6	38.4	0	1	1	1	21.11.12	0	0	0	0	0	0	0	150	0	0	0	2	2565	0	1	0	8.9	10	10	10	0	0	0	0	0	0	2	3	0	1
32	0	165.5	50	54	58.8	60	18.2547	1	1	19.715	21.9056	10	6	38.5	0	1	1	1	21.11.14	0	0	0	0	0	1	0	300	0	0	0	1	3065	0	0	0	43	10	10	10	0	0	0	0	0	0	2	0	0	0
37	1	175	110	103.1	101.6	104	35.9184	4	4	33.6653	33.9592	-6	0.9	39.5	0	1	1	1	21.11.14	0	0	0	0	0	1	0	315	0	0	1	1	3450	0	0	0	64.5	10	10	10	0	0	0	0	0	0	2	0	0	0
28	0	160	47.8	48.3	55	61	18.6719	2	2	18.8672	23.8281	13.2	12.7	38.6	0	1	1	2	21.12.01	0	0	0	0	1	0	1	400	0	0	0	1	3280	0	0	0	61.2	7	9	10	0	0	1	0	0	0	2	1	1	1
32	0	162	75	72.2	77.6	85	28.578	4	3	27.5111	32.3884	10	12.8	39.3	0	2	1	3	21.12.01	0	0	0	0	1	0	1	400	0	1	0	2	3680	0	0	0	84.8	10	10	10	1	0	0	0	0	0	2	8	1	1
39	1	160	58.3	59.3	66.3	68.3	22.7734	2	2	23.1641	26.6797	10	9	26.4	1	2	2	3	21.12.13	0	0	0	0	0	0	0	400	0	1	0	2	740	0	1	0	1.4	5	8	9	1	1	1	1	0	0	2	2	1	1
34	0	156	62.5	62.2	63.7	69	25.6821	3	3	25.5588	28.3531	6.5	6.8	39.5	0	1	1	3	21.12.16	0	0	0	0	0	0	0	500	0	0	0	2	3080	0	0	0	29.7	10	10	10	0	0	0	0	0	0	2	3	1	1
32	0	157	54	56.3	60.4	64	21.9076	2	2	22.8407	25.9645	10	7.7	35.6	1	1	1	3	21.12.18	0	0	0	0	0	1	0	400	0	0	0	1	2550	0	0	0	48.6	10	10	10	0	0	0	0	0	0	2	0	0	1
34	0	158	58.5	57.1	63.2	69.5	23.4337	2	2	22.8729	27.8401	11	12.4	39	0	2	2	1	21.12.27	0	0	0	0	0	0	0	210	0	0	1	1	3410	0	0	0	70.5	10	10	10	0	0	0	0	0	0	2	11	0	1
32	0	156	53.5	53.8	56.7	66	21.9839	2	2	22.1072	27.1203	12.5	12.2	40	0	2	2	1	21.2.11	0	0	0	0	0	0	0	400	0	0	0	1	3420	0	0	0	58	10	10	10	0	0	0	0	0	0	2	0	0	0
33	0	159	53	60.1	66.9	67	20.9644	2	2	23.7728	26.5021	14	6.9	40	0	2	1	3	21.2.18	0	0	0	0	0	0	0	400	0	0	0	2	4020	1	0	1	95.4	10	10	10	1	0	0	0	0	0	2	3	1	0
39	1	158	70.3	69.7	71.9	74.8	28.1606	4	3	27.9202	29.9631	4.5	5.1	37.4	0	4	2	3	21.2.20	0	0	0	0	0	0	0	300	0	0	1	2	1970	0	1	0	0.6	8	9	9	0	0	0	0	0	0	2	8	1	0
31	0	160	74.2	75.4	77.6	84.2	28.9844	4	3	29.4531	32.8906	10	8.8	39.6	0	1	1	3	21.2.20	0	0	0	0	0	0	0	400	0	0	0	2	3800	0	0	0	88.1	8	10	10	1	0	0	0	0	0	2	2	1	1
38	1	160	64.2	65.9	71.3	72.5	25.0781	3	3	25.7422	28.3203	8.3	6.6	38	0	2	2	3	21.2.22	0	0	0	0	0	0	0	500	0	1	0	1	5020	1	0	1	100	7	10	10	1	1	0	1	0	0	2	0	0	1
33	0	160	82		83	86.5	32.0312	4	4	0	33.7891	4.5		36.2	1	1	1	3	21.2.5	0	0	0	0	0	0	0	300	0	0	0	1	2590	0	0	0	43.1	9	10	10	0	0	0	0	0	0	2	0	0	1
27	0	168	75	75.1	77	84	26.5731	3	3	26.6086	29.7619	9	8.9	38.1	0	2	1	1	21.3.14	0	0	0	0	0	0	0	220	0	0	0	2	2865	0	0	0	34	10	10	10	0	0	0	0	0	0	2	1	0	1
37	1	162	67.6	65.41	67.1	67.9	25.7583	3	3	24.9238	25.8726	0.3	2.49	39	0	3	1	1	21.3.26	0	0	0	0	1	0	0	300	0	0	0	1	2820	0	0	0	18.6	10	10	10	0	0	0	0	0	0	2	0	0	0
37	1	168	63	69.2	75	83	22.3214	2	2	24.5181	29.4076	20	13.8	37	0	2	2	3	21.3.5	0	0	0	0	0	0	0	400	0	0	0	2	2580	0	0	0	27.9	8	10	10	0	0	0	0	0	0	2	0	0	1
31	0	170	82.4	83.3	90.4	92.4	28.5121	4	3	28.8235	31.9723	10	9.1	38.6	0	1	1	3	21.3.7	0	0	0	0	0	0	0	500	0	0	0	1	3350	0	0	0	67.5	10	10	10	0	0	0	0	0	0	2	3	1	1
38	1	162	59	60.2	68.1	73	22.4813	2	2	22.9386	27.8159	14	12.8	39.5	0	2	2	1	21.3.8	0	0	1	0	0	0	0	280	0	0	0	2	3345	0	0	0	54.6	10	10	10	0	0	0	0	0	0	2	0	0	0
37	1	166	72.7	75.4	75	83.7	26.3826	3	3	27.3625	30.3745	11	8.3	38.6	0	3	1	3	21.4.16	0	0	0	0	0	0	0	300	0	0	0	1	4000	1	0	1	97.7	10	10	10	0	0	0	0	0	0	2	1	0	1
33	0	163	55	55.6	59.5	67	20.7008	2	2	20.9266	25.2174	12	11.4	38.1	0	2	1	1	21.4.18	0	0	0	0	0	0	0	510	0	0	0	2	2365	0	1	0	4.6	10	10	10	0	0	0	0	0	0	2	5	1	1
33	0	159.5	97	97	101.4	107.5	38.1286	4	4	38.1286	42.2559	10.5	10.5	38	0	3	1	3	21.4.21	0	0	0	0	0	1	0	600	0	0	0	1	3110	0	0	0	60	10	10	10	0	0	0	1	0	0	2	0	0	0
33	1	172	93	92	99.6	102	31.4359	2	2	31.0979	34.4781	9	10	37.5	0	4	2	3	21.4.22	0	0	0	0	0	0	0	300	0	0	0	2	3150	0	0	0	68.7	10	10	10	0	0	0	0	0	0	2	0	1	1
36	0	160	52.1	52.1	57	62.7	20.3516	4	4	20.3516	24.4922	10.6	10.6	39	0	1	1	1	21.4.22	0	0	0	0	0	0	0	335	0	0	0	1	3460	0	0	0	74.5	10	10	10	0	0	0	0	0	0	2	2	0	1
42	1	160	54.5	56.4	62.9	62.5	21.2891	2	2	22.0312	24.4141	8	6.1	39.1	0	1	1	3	21.4.23	0	0	0	0	0	0	0	300	0	0	0	2	3320	0	0	0	60.5	10	10	10	0	0	0	0	0	0	2	0	0	0
33	0	159	47	47.6	53.5	56	18.591	2	2	18.8284	22.151	9	8.4	40.1	0	1	1	1	21.4.24	0	0	0	0	0	0	0	425	0	0	0	2	3255	0	0	0	13.5	10	10	10	0	0	0	0	0	0	2	0	0	1
34	0	151	52.1	53.2	59.5	62.6	22.8499	2	2	23.3323	27.4549	10.5	9.4	38.3	0	2	2	1	21.4.24	0	0	0	0	0	0	0	180	0	0	0	1	2640	0	0	0	40	9	10	10	0	0	0	0	0	0	2	6	0	0
33	0	160	56.2	64.6	68.9	71.2	21.9531	2	2	25.2344	27.8125	15	6.6	35.3	1	3	2	3	21.4.5	0	0	0	0	1	0	0	450	0	0	0	1	2460	0	0	0	48.8	10	10	10	1	0	0	0	0	0	2	0	0	1
29	0	157	46	50.4	54.3	60	18.662	2	2	20.4471	24.3418	14	9.6	38.3	0	1	1	3	21.4.9	0	0	0	0	0	0	1	800	0	0	0	2	3910	1	0	0	97.4	10	10	10	0	0	0	0	0	0	2	2	0	1
28	0	168	67	73	74.5	79	23.7387	2	2	25.8645	27.9904	12	6	39.1	0	1	1	1	21.5.11	0	0	0	0	0	1	0	180	0	0	0	1	3320	0	0	0	60.5	10	10	10	0	0	0	0	0	0	2	2	1	1
37	1	172	80	82.4	86.8	87.5	27.0416	3	3	27.8529	29.5768	7.5	5.1	39.2	0	2	1	1	21.5.14	0	0	0	0	0	1	1	320	0	0	0	2	3635	0	0	0	83.4	10	10	10	0	0	0	0	0	0	2	0	0	1
29	0	156	65	72.1	76.5	81.5	26.7094	3	3	29.6269	33.4895	16.5	9.4	37	0	3	1	1	21.5.4	0	0	0	0	0	0	0	350	0	0	0	2	2830	0	0	0	52.4	10	10	10	0	0	0	0	0	0	2	0	0	1
28	0	166	76		79.4	82	27.5802	3	3	0	29.7576	6		34.5	1	1	1	3	21.6.12	0	0	0	0	1	1	0	300	0	0	0	1	2360	0	0	0	55.3	10	10	10	1	0	0	0	0	0	2	2	1	1
29	0	162	63.1	60.4	73.2	81.1	24.0436	3	2	23.0148	30.9023	18	20.7	33.5	1	1	1	3	21.6.18	0	0	0	0	0	0	0	550	0	1	0	2	2280	0	0	0	71.9	7	10	10	1	0	0	0	0	0	2	7	1	1
33	1	178	61.9	63.5	70.4	68	19.5367	3	2	20.0417	21.4619	6.1	4.5	38.6	0	3	2	1	21.6.20	0	0	0	0	1	0	0	400	0	0	0	1	3655	0	0	0	88.1	10	10	10	0	0	0	0	0	0	2	16	0	1
30	0	168	82.8			97.8	29.3367	4	3	0	34.6514	15		39.3	0	1	1	3	21.6.28	0	0	0	0	0	0	0	350	0	0	1	2	3880	1	0	0	93.4	10	10	10	0	0	0	0	0	0	2	0	0	1
36	1	158	69	70.8	76.3	79	27.6398	3	3	28.3608	31.6456	10	8.2	37.6	0	1	1	3	21.6.7	0	0	0	0	0	0	0	500	0	0	0	2	2680	0	0	0	22.8	10	10	10	0	0	0	1	0	0	2	0	0	1
34	0	167	55	65.8	69.3	73	19.721	2	2	23.5935	26.1752	18	7.2	38	0	1	1	3	21.7.13	0	0	0	0	0	1	0	400	0	0	0	1	3040	0	0	0	53.3	10	10	10	0	0	0	0	0	0	2	0	0	1
37	1	163.5	57.9			75.9	21.6592	2	2	0	28.3927	18		38.1	0	1	1	3	21.7.16	0	0	0	0	0	0	0	300	0	0	0	1	2660	0	0	0	17.7	10	10	10	0	0	0	0	0	0	2	11	0	1
34	0	153	57	60.5	63.4	60	24.3496	3	2	25.8448	25.6312	3	-0.5	39.2	0	1	1	3	21.7.27	0	0	0	0	1	0	0	500	0	0	1	1	2290	0	1	0	1	10	10	10	0	0	0	0	0	0	2	0	0	1
33	0	158	54	59.4	65	66	21.6311	2	2	23.7943	26.4381	12	6.6	38.4	0	1	1	2	21.7.7	0	0	0	0	1	0	0	800	0	0	0	1	3010	0	0	0	40.2	10	10	10	0	0	0	0	0	0	2	0	0	1
41	1	153	70.4	70.8	72.1	75.4	30.0739	4	4	30.2448	32.2098	5	4.6	39	0	4	2	3	21.7.9	0	0	0	0	0	0	0	400	0	0	0	1	3180	0	0	0	49.4	10	10	10	0	0	0	0	0	0	2	4	1	1
38	1	154.5	52	54.1	57.7	61	21.7844	2	2	22.6642	25.5548	9	6.9	39.1	0	2	2	1	21.8.11	0	0	1	0	0	0	0	320	0	0	0	1	3320	0	0	0	60.5	9	10	10	0	0	0	0	0	0	2	0	0	1
26	0	173	75.5		82.5	85.5	25.2264	3	3	0	28.5676	10		39.2	0	1	1	3	21.8.12	0	0	0	0	0	0	0	300	0	0	0	1	3170	0	0	0	43.9	10	10	10	0	0	0	0	0	0	2	1	1	1
40	1	164	53	56.2	58.4	60	19.7055	2	2	20.8953	22.3081	7	3.8	37	0	2	1	3	21.8.16	0	0	0	0	0	0	0	600	0	0	0	1	2960	0	0	0	65.1	10	10	10	0	0	0	0	0	0	2	0	0	0
37	1	164	75.1	75.1	76.6	78	27.9224	3	3	27.9224	29.0006	2.9	2.9	37	0	4	2	3	21.8.18	0	0	0	0	0	0	0	0	0	0	0	1	3160	0	0	0	81.1	10	10	10	0	0	0	0	0	0	2	0	0	1
30	0	158	69.6	70.8	73.5	74.6	27.8801	3	3	28.3608	29.883	5	3.8	39	0	3	2	3	21.8.24	0	0	0	0	0	0	0	0	0	0	0	1	3160	0	0	0	47.5	10	10	10	0	0	0	0	0	0	2	8	1	1
31	0	151	72.4	75.3	80.2	84.3	31.753	4	4	33.0249	36.9721	11.9	9	38.1	0	1	1	3	21.9.13	0	0	0	0	0	0	0	1000	0	0	0	1	3500	0	0	0	86.9	10	10	10	0	0	0	0	0	0	2	1	1	1
27	0	160	66	72	83.3	89	25.7812	3	3	28.125	34.7656	23	17	38	0	1	1	3	21.9.16	0	0	0	0	0	0	0	500	0	0	0	1	3980	1	0	0	98.9	9	10	10	0	0	0	0	0	0	2	10	1	1
35	1	167	78.5	79.3	82.3	88	28.1473	4	3	28.4341	31.5537	9.5	8.7	39	0	2	1	1	21.9.18	0	0	0	0	0	0	0	220	0	0	0	2	3420	0	0	0	71.3	10	10	10	0	0	0	0	0	0	2	7	1	1
32	0	160	87	86.1	86.4	90	33.9844	4	4	33.6328	35.1562	3	3.9	39	0	4	3	3	21.9.3	0	0	0	0	1	0	0	0	0	0	0	1	3170	0	0	0	48.4	10	10	10	0	0	0	0	0	0	2	0	0	1
34	1	154	66.7	68.9	72.6	76.7	28.1245	3	2	29.0521	32.341	10	7.8	39.2	0	1	1	3	22.01.04	0	0	0	0	1	0	0	0	0	0	0	1	3330	0	0	0	45.9	10	10	10	0	0	0	0	0	0	2	4	0	1
43	0	164	65.7	70.8	73.3	75.7	24.4274	4	3	26.3236	28.1454	10	4.9	38.6	0	2	1	3	22.01.04	0	0	0	0	0	0	0	200	0	0	0	2	3120	0	0	0	59.3	10	10	10	0	0	0	0	0	0	2	0	1	1
33	0	155	58	60.6	71.9	73	24.1415	3	2	25.2237	30.385	15	12.4	38	0	3	3	1	22.01.07	0	0	0	0	0	0	0	180	0	0	0	2	2485	0	1	0	9.5	10	10	10	1	1	0	0	0	0	2	0	0	1
40	1	154	57	56	58.8	62.5	24.0344	3	2	23.6128	26.3535	5.5	6.5	38.1	0	1	1	3	22.01.11	0	0	0	0	0	0	0	300	0	0	0	2	2780	0	0	0	26.6	10	10	10	0	0	0	0	0	0	2	1	0	1
35	1	162	67.2	69.5	74.2	78.2	25.6059	3	3	26.4822	29.7973	11	8.7	38.1	0	4	3	3	22.01.14	0	0	0	0	0	0	0	400	0	0	0	1	3580	1	0	0	90.5	9	10	10	0	0	0	0	0	0	2	0	0	0
34	0	170	68	74.9	85.3	88	23.5294	2	2	25.917	30.4498	20	13.1	40.4	0	1	1	1	22.01.21	0	0	0	0	0	0	0	410	0	0	0	1	3815	0	0	0	85.7	10	10	10	0	0	0	0	0	0	2	0	0	0
35	1	166	62.1	62.7	67.7	69	22.5359	2	2	22.7537	25.0399	6.9	6.3	38.5	0	2	1	3	22.01.29	0	0	0	0	0	0	0	200	0	0	0	1	3070	0	0	0	43.5	10	10	10	0	0	0	0	0	0	2	0	0	0
34	0	157	65.3	65	69	76.3	26.4919	3	3	26.3702	30.9546	11	11.3	37.6	0	1	1	3	22.01.30	0	0	0	0	0	0	0	300	0	0	0	1	2850	0	0	0	37.5	10	10	10	1	0	0	0	0	0	2	3	1	1
36	1	172	82	81.1	81.7	82	27.7177	3	3	27.4135	27.7177	0	0.9	39.1	0	2	2	1	22.02.03	0	0	0	0	0	0	0	350	0	0	0	2	3315	0	0	0	60	10	10	10	0	0	0	0	0	0	2	0	0	1
39	1	160	65.5	66.5	68.3	72	25.5859	3	3	25.9766	28.125	6.5	5.5	38.6	0	1	1	3	22.02.22	0	0	0	0	0	0	0	300	0	0	0	2	3400	0	0	0	71.7	10	10	10	0	0	1	0	0	0	2	0	0	0
31	0	165	72.7	75	83	87.7	26.7034	3	3	27.5482	32.213	15	12.7	39.2	0	3	1	3	22.02.23	0	0	0	0	1	0	1	400	0	0	0	1	3450	0	0	0	70	10	10	10	0	0	0	0	0	0	2	1	0	1
35	1	160	70	82.3	85.5	90	27.3438	3	3	32.1484	35.1562	20	7.7	39.3	0	2	1	3	22.02.24	0	0	0	0	0	0	0	300	0	0	0	1	3560	0	0	0	77	10	10	10	0	0	0	0	0	0	2	4	0	1
30	0	169	68	83	82	84	23.8087	2	2	29.0606	29.4107	16	1	39.1	0	1	1	3	22.02.26	0	0	0	0	0	0	1	500	0	0	0	2	3980	1	0	0	96.7	10	10	10	0	0	0	0	0	0	2	1	0	0
27	0	176	84.1	84.6	93.5	99.1	27.1501	3	3	27.3115	31.9925	15	14.5	38.3	0	2	1	3	22.02.28	0	0	0	0	0	0	0	300	0	0	1	2	3430	0	0	0	79.6	10	10	10	0	0	0	0	0	0	2	2	1	1
32	0	154	48.2	48.2	53.3	56	20.3238	2	2	20.3238	23.6128	7.8	7.8	38.1	0	4	1	1	22.03.05	0	0	0	0	0	0	0	200	0	0	0	2	2300	0	1	0	3.2	10	10	10	0	0	0	0	0	0	2	0	0	1
38	1	161	119	117.1	119.1	126.2	45.9087	4	4	45.1757	48.6864	7.2	9.1	38.2	0	3	1	3	22.03.15	0	0	0	0	0	0	0	800	0	0	0	1	3200	0	0	0	63.3	10	10	10	0	0	0	1	0	0	2	2	1	1
32	0	160	56		69	71	21.875	2	2	0	27.7344	15		37	0	1	1	1	22.03.28	0	0	0	0	0	1	0	260	0	0	0	2	2920	0	0	0	61.4	10	10	10	0	0	0	0	0	0	2	0	0	1
41	1	158	52.3	75.3	82	75.3	20.9502	2	2	30.1634	30.1634	23	0	38.1	0	5	1	3	22.03.29	0	0	0	0	0	0	0	500	0	0	0	1	3770	1	0	0	96	10	10	10	0	0	0	0	0	0	2	2	1	1
38	1	161	67	67	73	78	25.8478	3	3	25.8478	30.0914	11	11	39.2	0	1	1	3	22.04.14	0	0	0	0	0	0	0	500	0	0	0	1	3510	0	0	0	74.8	10	10	10	0	0	0	0	0	0	2	0	0	1
40	1	158	56	55.2	63.2	66	22.4323	2	2	22.1118	26.4381	10	10.8	37.2	0	3	2	3	22.05.08	0	0	0	0	0	0	0	400	0	0	0	1	3200	0	0	0	81.6	10	10	10	0	0	0	0	0	0	2	0	0	0
33	0	162	50	51.3	53.1	60	19.052	2	2	19.5473	22.8624	10	8.7	38.5	0	1	1	1	22.05.12	0	0	0	0	0	0	1	0	0	0	0	2	2710	0	0	0	14.7	10	10	10	0	0	0	0	0	0	2	0	0	1
32	0	167.5	65	67	75	79	23.1677	2	2	23.8806	28.1577	14	12	39	0	2	2	1	22.05.13	0	0	0	0	0	0	0	0	0	0	0	2	3785	1	0	0	92.4	10	10	10	0	0	0	0	0	0	2	0	0	1
40	1	169	101.1	102.5	106	111.1	35.3979	4	4	35.8881	38.8992	10	8.6	38.4	0	2	2	3	22.05.17	0	0	0	0	0	0	0	0	0	0	1	1	3830	1	0	0	95.6	10	10	10	0	0	0	0	0	0	2	0	0	0
36	1	165	78	77	80.1	81	28.6501	4	3	28.2828	29.7521	3	4	38	0	1	1	1	22.05.21	0	0	0	0	0	0	0	740	0	0	0	1	3365	0	0	0	80.7	10	10	10	0	0	0	0	0	1	2	0	0	1
37	1	160	61		68.5	71	23.8281	2	2	0	27.7344	10		38.4	0	2	1	3	22.05.24	0	0	0	0	0	0	0	0	0	0	0	2	3320	0	0	0	69.2	10	10	10	0	0	0	0	0	0	2	0	0	0
28	0	162.1	55.4	56		66.4	21.0835	2	2	21.3119	25.2698	11	10.4	37.4	0	2	1	1	22.05.26	0	0	0	0	1	1	0	0	0	0	0	1	3940	1	0	0	99.2	10	10	10	0	0	0	0	0	0	2	0	0	1
36	1	160	59	64.9	69.3	76	23.0469	2	2	25.3516	29.6875	17	11.1	39.2	0	1	1	1	22.06.03	0	0	0	0	0	0	0	0	0	0	1	2	2675	0	0	0	63.3	10	10	10	0	0	0	0	0	0	2	3	0	0
32	0	165	74.5	76.7	81.5	84.5	27.3646	3	3	28.1726	31.0376	10	7.8	38.2	0	2	1	2	22.06.03	0	0	0	0	0	0	1	0	0	0	0	1	3200	0	1	0	8.6	10	10	10	0	0	0	0	0	0	2	0	0	1
40	1	150	64.3	64.2	70.7	74.3	28.5778	4	3	28.5333	33.0222	10	10.1	39.3	0	3	2	3	22.06.09	0	0	0	0	0	0	0	0	0	0	0	1	3900	1	0	0	94	10	10	10	1	0	1	0	0	0	2	11	1	1
31	0	152	52	56.6	61.2	66	22.5069	2	2	24.4979	28.5665	14	9.4	39.6	0	1	1	2	22.06.10	0	0	0	0	0	0	1	800	0	0	0	1	3160	0	0	0	34.9	10	10	10	0	0	0	0	0	0	2	0	0	0
30	0	155	49	49		56.5	20.3954	2	2	20.3954	23.5172	7.5	7.5	35.6	1	1	1	1	22.06.12	0	0	0	0	0	1	0	0	0	0	0	1	2875	0	0	0	79.6	10	10	10	0	0	0	0	0	0	2	0	0	0
31	0	158	58	63.6	72.5	74	23.2335	2	2	25.4767	29.6427	16	10.4	39.4	0	1	1	3	22.06.14	0	0	0	0	1	0	0	0	0	0	0	1	3370	0	0	0	59	10	10	10	0	0	0	0	0	0	2	0	0	1
27	0	168	92.4	92.4		102	32.7381	4	4	32.7381	36.1395	9.6	9.6	39.1	0	1	1	3	22.06.18	0	0	0	0	0	0	1	0	0	0	0	2	3160	0	0	0	45.2	10	10	10	0	0	0	1	0	0	2	6	1	1
38	1	150	54.2	55.45	64.2	70	24.0889	3	2	24.6444	31.1111	15.8	14.55	39.5	0	3	1	3	22.06.24	0	0	0	0	1	0	0	0	0	0	1	2	2780	0	0	0	10.2	10	10	10	0	0	0	0	0	0	2	2	1	0
30	0	167	74.5		85.6	84.5	26.713	3	3	0	30.2987	10		34.2	1	2	1	3	22.06.30	0	0	0	0	0	0	0	0	0	0	1	2	1630	0	1	0	1.8	10	10	10	0	0	0	1	0	0	2	8	1	1
29	0	155	60	64.4	70.6	75.5	24.974	3	3	26.8054	31.4256	15.5	11.1	38	0	1	1	3	22.07.01	0	0	0	0	1	0	0	0	0	1	1	1	2710	0	0	0	15.2	3	6	8	1	1	1	0	0	0	2	0	0	1
39	1	161	85	88.7	93.7	100	32.7919	4	4	34.2194	38.5788	15	11.3	37.1	0	3	1	3	22.07.01	0	0	0	0	0	0	0	0	0	0	0	2	2440	0	0	0	23.1	10	10	10	0	0	0	1	0	1	2	6	1	1
35	0	168	85	89.5	93	100	30.1162	3	3	31.7106	35.4308	15	10.5	38.6	0	4	3	3	22.07.05	0	0	0	0	0	0	0	0	0	0	0	2	3380	0	0	0	70	10	10	10	0	0	0	0	0	0	2	4	0	0
34	1	161	69	73.9	78	81	26.6193	4	4	28.5097	31.2488	12	7.1	39.1	0	1	1	3	22.07.05	0	0	0	0	0	0	0	0	0	0	0	2	3270	0	0	0	55.8	10	10	10	0	0	0	1	0	0	2	0	1	1
33	0	164	80	79.8	86	91	29.7442	4	3	29.6698	33.834	11	11.2	38.3	0	1	1	2	22.07.06	0	0	0	0	0	0	1	0	0	0	0	1	2725	0	0	0	18.7	10	10	10	0	0	0	1	0	0	2	1	1	1
34	0	160	57	63.9	66	69	22.2656	2	2	24.9609	26.9531	12	5.1	38.3	0	1	1	1	22.07.07	0	0	0	0	0	1	0	0	0	0	0	1	3225	0	0	0	63.2	10	10	10	0	0	0	0	0	0	2	0	0	0
41	1	165	79		84.9	89	29.0174	4	3	0	32.6905	10		38.6	0	2	1	3	22.07.11	0	0	0	0	0	0	0	0	0	0	0	2	3340	0	0	0	66.6	10	10	10	0	0	0	0	0	0	2	1	0	1
28	0	168	83.7	83.7	85.6	85	29.6556	4	3	29.6556	30.1162	1.3	1.3	39.2	0	1	1	1	22.07.14	0	0	0	0	1	0	0	0	0	0	0	2	2940	0	0	0	23.8	9	10	10	0	0	0	0	0	0	2	0	0	1
33	0	165	88.9	89.2	92.1	99	32.6538	4	4	32.764	36.3636	10.1	9.8	39.2	0	2	1	1	22.07.21	0	0	1	0	0	0	0	0	0	0	0	2	2725	0	0	0	10.7	10	10	10	0	0	1	0	0	0	2	2	1	1
35	0	161	57.5	59	65.5	72	22.1828	2	2	22.7615	27.7767	14.5	13	39.1	0	2	1	3	22.07.22	0	0	0	0	1	0	1	1200	0	0	0	2	3700	0	0	0	88	10	10	10	0	0	0	1	0	0	2	2	1	1
31	0	163	67	66.2	76.1	79	25.2174	3	3	24.9163	29.7339	12	12.8	39.2	0	1	1	2	22.07.25	0	0	0	0	1	0	1	825	0	0	1	2	3045	0	0	0	32.4	10	10	10	1	0	0	0	0	0	2	0	0	1
39	1	164	74.6	76.2	77.4	79.6	27.7365	3	3	28.3314	29.5955	5	3.4	39	0	3	1	3	22.08.01	0	0	0	0	0	0	0	0	0	0	0	2	3220	0	0	0	53.3	10	10	10	0	0	0	0	0	0	2	0	0	1
34	0	153	53	52.3	57.2	62.1	22.6409	2	2	22.3418	26.5283	9.1	9.8	38	0	3	1	3	22.08.02	0	0	0	0	0	0	1	0	0	0	0	1	3120	0	0	0	61	10	10	10	0	0	0	0	0	0	2	0	0	0
36	1	160	71	76.3	82.1	81	27.7344	3	3	29.8047	31.6406	10	4.7	38.2	0	3	2	3	22.08.04	0	0	0	0	0	0	0	0	0	0	0	1	3910	1	0	0	97.8	10	10	10	0	0	0	0	0	0	2	0	0	1
31	0	158	57.8		65	67.3	23.1533	2	2	0	26.9588	9.5		37	0	1	1	3	22.08.05	0	0	0	0	1	0	0	0	0	0	0	1	2670	0	0	0	36.3	9	10	10	0	0	0	0	1	3	2	0	0	1
44	1	160	68.2	74.8	77.7	77.2	26.6406	3	3	29.2188	30.1562	9	2.4	34.1	1	2	2	3	22.08.15	0	0	0	0	0	0	0	0	0	0	0	1	2110	0	0	0	39.4	9	10	10	1	1	0	1	0	1	2	5	1	1
37	1	157	81.8	82.2	84	91	33.1859	4	4	33.3482	36.9183	9.2	8.8	34.1	1	2	2	3	22.08.16	0	0	0	0	0	1	0	0	0	0	0	1	2220	0	0	0	53.5	10	10	10	1	0	0	1	0	1	2	0	0	1
27	0	164	58.5	62.3	64.3	69	21.7504	2	2	23.1633	25.6544	10.5	6.7	39.1	0	2	1	1	22.08.19	0	0	0	0	0	0	0	0	0	0	0	2	2775	0	0	0	14.4	10	10	10	0	0	0	0	0	0	2	9	1	1
34	0	158	73.3	75.8	79.3	83.3	29.3623	4	3	30.3637	33.368	10	7.5	39.2	0	2	1	2	22.08.23	0	0	0	0	1	0	0	720	0	0	0	1	3370	0	0	0	63	10	10	10	0	0	0	0	0	0	2	0	0	1
35	1	163	58	59.4	66	73.5	21.83	2	2	22.3569	27.6638	15.5	14.1	38.1	0	2	2	3	22.08.26	0	0	0	0	0	0	0	0	0	0	0	1	2880	0	0	0	35.3	10	10	10	0	0	0	0	0	0	2	6	1	1
27	0	155	63.6	61	63.6	69.6	26.4724	3	3	25.3902	28.9698	6	8.6	39.3	0	2	1	3	22.09.26	0	0	0	0	0	0	1	0	0	0	0	1	3470	0	0	0	69.9	10	10	10	1	0	0	0	0	0	2	0	0	1
33	0	143	50	55.3	59.3	65.1	24.4511	3	2	27.0429	31.8353	15.1	9.8	38.1	0	1	1	3	22.09.27	0	0	0	0	0	0	0	0	0	0	0	2	3740	1	0	0	95.4	10	10	10	0	0	0	0	0	0	2	1	1	1
31	0	160	66	65.9	69.7	72	25.7812	3	3	25.7422	28.125	6	6.1	40.1	0	7	1	1	22.09.27	0	0	0	0	0	0	0	0	0	0	0	1	3780	0	0	0	85.3	9	9	9	1	0	0	0	0	0	2	0	0	0
37	1	159	81	83.2	86.4	91.5	32.0399	4	4	32.9101	36.1932	10.5	8.3	39.6	0	3	1	3	22.09.30	0	0	0	0	0	0	1	0	0	0	0	2	3640	0	0	0	78.5	10	10	10	0	0	0	0	0	0	2	5	1	1
30	0	157	94	93.3	95.1	102	38.1354	4	4	37.8514	41.381	8	8.7	38.3	0	2	1	3	22.10.02	0	0	0	0	0	0	0	0	0	0	0	2	3210	0	0	0	61.8	10	10	10	0	0	0	1	0	0	2	2	1	1
39	1	160	97.4	96	100.5	103	38.0469	4	4	37.5	40.2344	5.6	7	38.2	0	2	1	1	22.10.14	0	0	1	0	1	0	0	0	0	0	0	1	3100	0	0	0	53.9	8	10	10	0	0	0	0	0	0	2	4	1	1
29	0	164	106	100	100.4	108	39.4111	4	4	37.1802	40.1547	2	8	37.3	0	1	1	3	22.10.15	0	0	0	0	0	0	0	0	0	0	0	1	3170	0	0	0	75.2	8	10	10	0	0	0	1	0	1	2	1	1	1
30	0	168	70	74.5	83.1	83	24.8016	3	2	26.396	29.4076	13	8.5	39.2	0	1	1	3	22.10.24	0	0	0	0	0	0	1	0	0	0	0	2	3300	0	0	0	56.5	10	10	10	1	0	1	0	0	0	2	0	0	0
39	1	163	70	72.2	71.2	77.9	26.3465	3	3	27.1745	29.3199	7.9	5.7	39	0	1	1	3	22.10.25	0	0	0	0	0	0	0	0	0	0	0	2	3130	0	0	0	44.6	10	10	10	0	0	0	0	0	0	2	10	1	1
40	1	160	93.5			112	36.5234	4	4		43.75	18.5		30.2	1	3	2	3	22.10.28	0	0	0	0	0	0	0	0	0	0	0	2	1290	0	0	0	18.8	10	10	10	0	0	0	1	0	0	2	0	0	1
32	0	168	85.1	85.1	90.1	91.6	30.1516	4	4	30.1516	32.4546	6.5	6.5	37.6	0	2	1	1	22.11.17	0	0	0	0	0	0	0	0	0	0	0	1	2800	0	0	0	32.9	8	10	10	0	0	0	0	0	0	2	4	1	1
38	1	154	67.8	68.6	70.3	74.8	28.5883	4	3	28.9256	31.5399	7	6.2	37	0	1	1	3	22.12.08	0	0	0	0	0	0	0	0	0	0	0	1	2690	0	0	0	38.3	10	10	10	0	0	0	0	0	0	2	0	0	1
28	0	163	60	62.6	68.6	72	22.5827	2	2	23.5613	27.0993	12	9.4	35.6	1	3	1	1	22.12.11	0	0	0	0	0	1	0	0	0	0	0	1	2810	0	0	0	74.5	10	10	10	0	0	0	0	0	0	2	0	0	0
35	1	155	42.8		45	52.8	17.8148	1	1	0	21.9771	10		37.1	0	4	1	3	22.12.15	0	0	0	0	0	0	0	0	0	0	0	2	2470	0	0	0	17.1	10	10	10	1	0	0	1	0	0	2	6	1	1
42	1	165	72	71.6	76.5	82	26.4463	3	3	26.2994	30.1194	10	10.4	34	1	2	1	3	22.12.17	0	0	0	0	1	0	0	0	0	0	0	2	1870	0	0	0	15.7	10	10	10	1	0	1	1	0	1	2	0	0	1
48	1	164	51.5	52.7	57.4	65.5	19.1478	2	2	19.594	24.3531	14	12.8	38.4	0	4	1	3	22.12.21	0	0	0	0	0	0	0	0	0	0	0	2	3040	0	0	0	85.5	10	10	10	0	0	0	0	0	0	2	7	1	1
38	1	167	72	74.2	77.2	76.6	25.8166	3	3	26.6055	27.466	4.6	2.4	29.3	1	1	1	1	22.12.21	0	0	0	0	0	0	0	0	0	0	0	1	1490	0	0	0	43.1	10	10	10	1	1	0	0	0	0	2	0	0	1
34	0	160	70	74.4	76.6	78	27.3438	3	3	29.0625	30.4688	8	3.6	39.2	0	5	1	3	22.12.25	0	0	0	0	0	0	0	0	0	0	0	1	3770	1	0	0	90.2	10	10	10	0	0	1	0	0	0	2	0	0	1
38	1	163	86	86.6	92.1	92	32.3685	4	4	32.5944	34.6268	6	5.4	37	0	2	2	3	22.12.30	0	0	0	0	0	0	0	0	0	0	0	2	4010	1	0	1	99.8	10	10	10	0	0	0	0	0	3	2	0	0	1
36	1	163	60.1	60.4	70.4	78.6	22.6203	2	2	22.7333	29.5833	18.5	18.2	39.2	0	3	1	3	23.01.11	0	0	0	0	0	0	0	0	0	0	0	2	3030	0	0	0	31.1	10	10	10	0	0	0	0	0	0	2	2	1	1
40	1	160	70.5	73	96.3	88	27.5391	3	3	28.5156	34.375	17.5	15	37.6	0	7	2	1	23.01.12	0	0	0	0	0	1	0	0	0	0	0	1	3630	1	0	0	94	10	10	10	0	0	0	0	0	0	2	0	0	1
36	1	165	52	53.6	59.4	65	19.1001	2	2	19.6878	23.8751	13	11.4	39.1	0	2	2	1	23.01.23	0	0	0	0	0	0	0	600	0	0	0	1	3615	0	0	0	89.6	10	10	10	0	0	1	0	0	0	2	5	1	1
34	0	173	92	93.4	94.3	96.7	30.7394	4	4	31.2072	32.3098	4.7	3.3	38.4	0	2	2	1	23.01.23	0	0	0	0	0	0	0	0	0	0	0	2	3640	0	0	0	83.5	10	10	10	0	0	0	0	0	1	2	1	0	1
33	1	160	71	70	76.5	84	27.7344	3	3	27.3438	32.8125	13	14	37.6	0	1	1	1	23.01.30	0	0	0	0	0	0	0	0	0	0	0	1	3530	0	1	0	4.4	10	10	10	0	0	0	0	0	0	2	1	0	1
35	0	167	75	73.5	77	82	26.8923	3	3	26.3545	29.4023	7	8.5	37.4	0	2	1	1	23.01.30	0	0	0	0	0	0	0	0	0	0	1	2	2260	1	0	0	90.7	10	10	10	0	0	0	1	0	1	2	0	1	1
31	0	163	76.5	74.7	77.5	84	28.793	4	3	28.1155	31.6158	7.5	9.3	37.5	0	1	1	1	23.01.31	0	0	0	0	0	0	0	0	0	0	0	1	2155	0	1	0	2	10	10	10	0	0	0	0	0	0	2	1	1	1
35	1	161	65	65	69	75	25.0762	3	3	25.0762	28.9341	10	10	39.1	0	2	1	1	23.02.03	0	0	0	0	0	0	0	530	0	0	0	2	3235	0	0	0	52.4	10	10	10	0	0	0	0	0	0	2	4	1	1
39	1	163	83	91	95.2	98	31.2394	4	4	34.2504	36.8851	15	7	38.2	0	6	1	3	23.02.05	0	0	0	0	0	0	0	0	0	0	0	2	2700	0	0	0	18.7	10	10	10	0	0	0	0	0	0	2	2	0	1
35	1	167	86	85.4	87.6	92.5	30.8365	4	4	30.6214	33.1672	6.5	7.1	39.3	0	2	2	3	23.02.05	0	0	0	0	0	0	0	0	0	0	0	2	3860	1	0	0	92.8	10	10	10	0	0	0	0	0	0	2	0	1	0
36	1	163	57	53.9	61.9	72	21.4536	2	2	20.2868	27.0993	15	18.1	38.4	0	2	1	1	23.02.09	0	0	0	0	0	0	0	0	0	0	0	2	3710	0	0	0	45.5	10	10	10	0	0	0	0	0	0	2	0	0	1
40	1	168	68.3	71	76	77.3	24.1993	3	2	25.1559	27.388	9	6.3	37.5	0	3	2	1	23.02.09	0	0	0	0	0	0	0	0	0	0	1	1	2905	1	0	0	92.3	10	10	10	1	0	0	0	0	0	2	5	1	1
39	1	163	84	83.2	85.7	92.1	31.6158	4	4	31.3147	34.6645	8.1	8.9	38	0	2	2	1	23.03.01	0	0	0	0	0	0	0	0	0	0	0	1	3140	0	0	0	62.8	10	10	10	0	0	0	0	0	0	2	6	0	1
39	1	166	74.7	72.6	76.4	80.3	27.1084	3	3	26.3463	29.1407	5.6	7.7	38.1	0	1	1	3	23.03.11	0	0	0	0	1	0	0	0	0	0	0	2	2750	0	0	0	24.2	10	10	10	0	0	1	0	0	0	2	0	0	1
29	0	166	115	110.1	111.3	111	41.7332	4	4	39.955	40.2816	-4	0.9	38.2	0	2	1	3	23.03.11	0	0	0	0	0	1	1	0	0	0	1	1	3510	0	0	0	86	10	10	10	1	0	0	0	0	0	2	5	1	1
33	0	164	83	80.6	87.9	93	30.8596	4	4	29.9673	34.5776	10	12.4	40.2	0	1	1	1	23.03.12	0	0	0	0	0	0	0	815	0	0	0	2	3495	0	0	0	61.8	10	10	10	1	0	0	0	0	0	2	0	0	0
38	1	158	70	74.6	78	84	28.0404	3	3	29.883	33.6485	14	9.4	39.4	0	5	1	3	23.03.16	0	0	0	0	1	0	0	0	0	0	0	1	3320	1	0	0	96.6	10	10	10	0	0	0	0	0	0	2	1	0	1
30	1	159	71.45	80.9	83.6	91.3	28.2623	4	3	32.0003	36.1141	19.85	10.4	39.1	0	1	1	3	23.03.16	0	0	0	0	1	0	1	0	0	0	0	1	2600	0	1	0	6.8	9	10	10	0	0	0	0	0	0	2	1	1	1
44	0	160	69.6	72.1	77.7	86.3	27.1875	4	3	28.1641	33.7109	16.7	14.2	38.1	0	3	1	3	23.03.16	0	0	0	0	0	0	0	0	0	0	0	1	3800	0	0	0	54.2	10	10	10	0	0	1	0	0	0	2	0	1	1
34	0	164	83	82	89.3	94	30.8596	4	4	30.4878	34.9494	11	12	40	0	1	1	3	23.03.24	0	0	0	0	0	0	0	0	0	0	0	2	3660	0	0	0	78.6	10	10	10	0	0	0	0	0	1	2	5	1	1
39	1	166	78.8	79.2	90.9	93.8	28.5963	4	3	28.7415	34.0398	15	14.6	36.2	1	2	2	3	23.03.30	0	0	0	0	0	0	0	0	0	0	0	2	2730	0	0	0	57.8	10	10	10	1	0	0	0	0	0	2	3	1	1
39	1	156	67	71	76	87.2	27.5312	3	3	29.1749	35.8317	20.2	16.2	37.1	0	1	1	3	23.04.04	0	0	0	0	0	0	0	0	0	0	0	1	3390	1	0	0	91.2	8	10	10	0	0	0	1	0	0	2	3	1	1
40	1	151	63.4	66.2	68.7	70.4	27.8058	3	3	29.0338	30.8758	7	4.2	32.6	1	2	2	3	23.04.13	0	0	0	0	1	0	0	0	0	0	1	2	2500	1	0	0	97.2	8	9	10	1	1	0	1	0	0	2	0	0	1
31	0	168	78	78.4	79.1	85	27.6361	3	3	27.7778	30.1162	7	6.6	37.3	0	1	1	3	23.04.17	0	0	0	0	0	0	0	0	0	0	0	2	2830	0	0	0	43.7	10	10	10	0	0	0	0	0	0	2	2	1	1
37	1	160	66.3			76.3	25.8984	3	3	0	29.8047	10		35.6	1	3	2	3	23.04.23	0	1	0	0	0	0	0	0	0	1	0	2	2910	0	0	0	82.1	6	9	10	1	0	0	0	0	0	2	0	0	1
36	1	171	89.7	91.4	95	105	30.6761	4	4	31.2575	35.9085	15.3	13.6	39.1	0	2	1	3	23.04.23	0	0	0	0	1	0	0	0	0	0	1	1	4000	1	0	1	97	10	10	10	0	0	0	0	0	0	2	8	1	1
34	0	170	77	79.4	83.5	89	26.6436	3	3	27.474	30.7958	12	9.6	37	0	2	1	3	23.04.30	0	0	0	0	0	1	0	0	0	0	0	2	3800	1	0	0	99.1	10	10	10	0	0	1	0	0	1	2	1	0	1
35	1	155	75.4	75	83.8	93.4	31.384	4	4	31.2175	38.8762	18	18.4	39	0	3	1	3	23.04.30	0	0	0	0	0	0	0	0	0	0	0	1	4440	1	0	1	99.8	10	10	10	0	0	1	0	0	0	2	10	0	1
40	1	158	52	55.8	60.5	65.5	20.83	2	2	22.3522	26.2378	13.5	9.7	37.5	0	1	1	3	23.05.03	0	0	0	0	0	0	0	0	0	0	1	2	2560	0	0	0	16.2	9	10	10	1	0	0	1	0	0	2	16	1	1
40	1	161	73	76.2	81.2	85	28.1625	4	3	29.397	32.7919	12	8.8	39.6	0	1	1	3	23.05.19	0	0	0	0	0	0	1	0	0	0	0	2	2750	0	1	0	8.1	10	10	10	0	0	0	0	0	0	2	1	1	1
28	0	162	70	68	74.6	77	26.6728	3	3	25.9107	29.34	7	9	39.3	0	1	1	3	23.05.20	0	0	0	0	0	0	0	0	0	0	0	2	3200	0	0	0	44.7	10	10	10	0	0	0	0	0	0	2	0	0	1
40	1	160	72.8	73.9	76.6	79.3	28.4375	4	3	28.8672	30.9766	6.5	5.4	37.5	0	2	1	3	23.05.22	0	0	0	0	0	0	0	0	0	0	0	1	2400	0	1	0	8	10	10	10	1	0	0	1	0	0	2	10	1	1
31	0	167	76	75.6	84.1	96	27.2509	3	3	27.1075	34.4222	20	20.4	38.6	0	1	1	2	23.06.05	0	0	0	0	1	1	1	0	0	0	0	1	3545	0	0	0	82.1	10	10	10	0	0	0	0	0	0	2	1	1	1
33	0	162.5	69.2	67.3	72.6	77	26.2059	3	3	25.4864	29.1598	7.8	9.7	39.3	0	4	2	3	23.06.06	0	0	0	0	0	0	0	0	0	0	0	2	3550	0	0	0	76.2	10	10	10	0	0	0	0	0	0	2	1	0	1
38	1	160	90.7		91.2	92.7	35.4297	4	4	0	36.2109	2		38.2	0	2	2	3	23.06.12	0	0	0	0	0	0	0	0	0	0	0	2	3600	1	0	0	90.2	10	10	10	0	0	0	0	0	0	2	4	0	1
36	1	159	52	54.5	56.7	58.5	20.5688	2	2	21.5577	23.1399	6.5	4	38.3	0	2	2	2	23.06.16	0	0	0	0	1	0	0	1	0	0	0	2	2885	0	0	0	31.1	10	10	10	0	0	0	0	0	0	2	0	0	1
31	0	161	76	76.6	79	83.9	29.3199	4	3	29.5513	32.3676	7.9	7.3	37.2	0	1	1	3	23.06.17	0	0	0	0	0	0	0	0	0	0	0	2	2520	0	0	0	20.7	10	10	10	0	0	0	1	0	0	2	0	0	0
38	1	165	73	74.7	78.5	87	26.8	3	3	27.4	32	14	12.3	38.5	0	1	1	3	2023-07-	0	0	0	0	0	0	0	0	0	0	0	1	3545	0	0	0	83.6	10	10	10	0	0	1	0	0	0	2	0	1	1
33	0	172	97.1	97.1	102.2	108	32.8	4	4	32.8	36.5	10.9	10.9	38	0	1	1	3	2023-07-	0	0	0	0	0	0	0	0	0	0	0	2	3600	1	0	0	92.2	10	10	10	1	0	0	0	0	0	2	0	0	1
46	1	160	66.9	68	70.5	77.1	26.1	3	3	26.6	30.1	10.2	9.1	34.4	1	5	3	3	2023-07-	0	0	0	0	0	0	0	0	0	0		2	2885	1	0	0	95.5	10	10	10	1	0	0	1	0	0	2	5	1	1
26	0	167	96.8	96.9	98.5	104	34.7	4	4	34.7	37.3	7.2	7.1	37.3	0	1	1	3	2023-07-	0	0	0	0	1	0	0	0	0	0	0	2	2475	0	0	0	14.2	10	10	10	0	0	0	1	0	0	2	0	0	1
31	0	160	75.3	74.1	73.2	79.8	29.4	4	3	28.9	31.2	4.5	5.7	35.5	1	3	1	3	2023-07-	0	0	0	0	1	0	0	0	0	0	0	2	2190	0	0	0	16.2	10	10	10	1	0	0	0	0	0	2	1	1	1
37	1	150	86	83	86.8	101	38.2	4	4	36.9	44.9	15	18	36.5	1	4	2	3	2023-08-	0	0	0	0	0	0	0	0	0	1	0	2	4110	1	0	1	99.9	4	8	9	1	0	0	1	0	0	2	0	0	1
38	1	170	90	89.5	91.1	89.3	31.1	4	4	31	30.9	-0.7	-0.2	33.2	1	2	1	3	2023-08-	0	0	0	0	0	0	0	0	0	0	0	1	2270	0	0	0	80.7	10	10	10	1	1	0	0	0	0	2	1	1	1
32	0	173	66	67.8	74.8	85.1	22.1	2	2	22.7	28.4	19.1	17.3	38.5	0	1	1	3	2023-08-	0	0	0	0	0	0	0	0	0	0	0	1	1940	0	1	0	0.1	9	10	10	1	0	0	0	0	0	2	15	1	1
32	0	160	110	111.1	116	118	43	4	4	43.4	46.1	8	6.9	38.3	0	3	1	1	2023-08-	0	0	0	0	0	0	0	0	0	0	0	2	3540	0	0	0	86.1	10	10	10	0	0	0	0	0	0	2	6	0	1
28	0	172	80	82	87.9	89.6	27	3	3	27.7	30.3	9.6	7.6	38.5	0	1	1	3	2023-08-	0	0	0	0	0	0	0	0	0	1	0	2	2860	0	0	0	24.9	7	9	9	0	0	0	0	0	0	2	5	1	1
25	0	158	78	78.5	77.8	85	31.2	4	4	31.4	34	7	6.5	39.1	0	1	1	3	2023-09-	0	0	0	0	0	0	0	0	0	0	0	2	2470	0	1	0	3.5	9	10	10	1	0	1	0	0	0	2	0	0	1
32	0	167	70	73.9	79.7	80	25.1	3	3	26.5	28.7	10	6.1	30.3	1	1	1	3	2023-09-	0	0	0	0	0	1	0	0	0	0	0	1	1570	0	0	0	69.7	9	10	10	1	1	0	0	0	0	2	0	0	1
41	1	162	74.5	75	77.9	81	28.4	4	3	28.6	30.9	6.5	6	35.5	1	1	1	3	2023-09-	0	0	0	0	0	0	0	0	0	0	0	1	2340	0	0	0	29.3	10	10	10	1	0	0	1	0	0	2	0	0	1
40	1	167	76	72	74.3	74.9	27.3	3	3	25.8	26.9	-1.1	2.9	33.4	1	3	1	3	2023-10-	0	0	0	0	0	1	0	0	0	0	0	2	2970	1	0	0	99.6	10	10	10	1	1	0	0	0	0	2	0	0	1
40	1	166	73	72	75	76.6	26.5	3	3	26.1	27.8	3.6	4.6	29	1	5	1	3	2023-10-	0	0	0	0	0	0	1	0	0	1	0	2	1300	0	0	0	65.4	6	7	8	1	1	0	0	0	0	2	3	1	1
38	1	156	65	66.4	70.8	75	26.7	3	3	27.3	30.8	10	8.6	39.2	0	1	1	3	2023-10-	1	0	0	0	0	0	1	0	0	0	0	1	3070	0	0	0	34.6	10	10	10	0	0	0	0	0	0	2	2	1	1
39	1	163	82	82	85.3	91.2	30.9	4	4	30.9	34.3	9.2	9.2	35.3	1	1	1	3	2023-10-	0	0	0	0	0	0	0	0	0	0	0	1	2380	0	0	0	39.8	10	10	10	1	1	0	0	0	0	2	0	0	1
40	1	166	83		87.5	89	30.1	4	4	0	32.3	6	89	38.1	0	6	2	1	2023-10-	0	0	0	0	0	0	0	700	0	0	0	1	4560	1	0	1	100	10	10	10	0	0	0	0	0	0	2	0	0	1
32	0	158	65	68	73.9	80	26	3	3	27.2	32	15	12	39.1	0	1	1	2	2023-10-	0	0	0	0	0	0	0	0	0	0	0	2	3210	0	0	0	50	10	10	10	0	0	0	0	0	0	2	4	1	1
35	1	164	86	87.9	90.9	95.4	32	4	4	32.7	35.5	9.4	7.5	39.3	0	2	2	3	2023-10-	0	0	0	0	0	0	0	0	0	0	0	2	3330	0	0	0	57.2	10	10	10	0	0	0	0	0	0	2	5	1	1
33	0	156.5	58.2	59.1	62.6	66.1	23.8	2	2	24.1	27	7.9	7	37.6	0	1	1	1	2023-10-	0	0	0	0	0	0	0	600	0	0	0	1	3185	0	0	0	69.3	10	10	10	0	0	0	0	0	0	2	4	1	1
38	1	162	90.5	91	96.2	103.5	34.5	4	4	34.7	39.4	13	12.5	37.4	0	3	2	3	2023-11-	0	0	0	0	1	0	0	0	0	0	0	1	3960	1	0	0	99.3	9	10	10	1	0	0	0	0	0	2	1	1	1
28	0	163	65	66	67.4	75.9	24.5	3	2	24.8	28.6	10.9	9.9	37.5	0	1	1	3	2023-11-	0	0	0	0	0	0	0	0	0	0	0	1	3800	1	0	0	97.8	10	10	10	0	0	0	0	0	0	2	0	0	1
38	1	165	71.8	69	74.3	78.5	26.4	3	3	25.3	28.8	6.7	9.5	39.4	0	2	1	3	2023-11-	0	0	0	0	1	0	1	0	0	0	0	1	3050	0	0	0	29	10	10	10	0	0	0	0	0	0	2	2	1	1
33	0	175	131.6	130.8	131.1	132.6	43	4	4	42.7	43.3	1	1.8	38.1	0	5	2	3	2023-11-	0	0	0	0	0	0	0	0	0	0	0	2	3660	1	0	0	93.2	10	10	10	0	0	0	0	0	0	2	0	0	1
35	1	169	78.5		79.7	82.5	27.5	3	3	0	28.9	4	82.5	38.2	0	3	1	1	2023-12-	0	0	0	0	0	0	0	0	0	0	0	2	2695	0	0	0	18.4	10	10	10	0	0	1	0	0	0	2	2	0	1
42	1	161	98	99	99.8	104.6	37.8	4	4	38.2	40.4	6.6	5.6	38	0	5	4	3	2023-12-	0	0	0	0	0	0	0	0	0	0	0	1	3330	0	0	0	78.3	10	10	10	0	0	0	0	0	0	2	1	1	1
35	1	163	67.9	67.2	69.8	75	25.6	3	3	25.3	28.2	7.1	7.8	39.3	0	1	1	3	2023-12-	0	0	0	0	0	0	0	0	0	0	0	1	3150	0	0	0	39.9	10	10	10	0	0	1	0	0	0	2	8	1	1
37	1	167	75			90.5	26.9	3	3	0	32.5	15.5	90.5	38.1	0	3	2	3	2023-12-	0	0	0	0	0	0	0	0	0	0	0	1	4010	1	0	1	98.9	10	10	10	0	0	0	0	0	0	2	4	1	1
32	0	158	58			69	23.2	2	2	0	27.6	11	69	37.3	0	2	2	3	2023-12-	0	0	0	0	0	1	0	0	0	0	0	1	2810	0	0	0	41.7	10	10	10	1	0	1	0	0	3	2	2	0	1
[truncated: 23 more columns]
