# Supplementary material for: Associations between maternal glycemic level and lipid profile and adverse pregnancy outcomes in women with type 2 diabetes mellitus: a retrospective study from China
Source: PeerJ journal article supplement (doi:10.7717/peerj.19502), 2025-06-04
Supplement: Supplemental_materials.docx [file Supplemental_materials.docx]

**Supplemental materials**

**Table S1 Reference range of serum lipid levels of normal pregnancy* (mmol/L)**

| **Items** | **nonpregnancy** | **First trimester** | **Second trimester** | **Third trimester** |
| --- | --- | --- | --- | --- |
| TG | <1.69 | 0.45~1.80 | 0.85~4.31 | 1.48~5.11 |
| TC | <5.17 | 3.65~5.43 | 4.55~7.73 | 5.66~9.03 |
| HDL-C | 1.03~1.55 | 1.03~2.02 | 1.34~2.25 | 1.24~2.25 |
| LDL-C | <2.59 | 1.55~3.96 | 1.99~4.76 | 2.61~5.79 |

* Refer to Williams Obstetrics, 25th edition
